# Supplementary material for: Host–Guest Recognition in the Crystalline State: Selective Inclusion of 1,4-Dibromobutane by Bromoethoxy-Functionalized Pillar[5]arenes
Source: Research Square preprint supplement (doi:10.21203/rs.3.rs-6846598/v1), 2025-07-25
Supplement: Supplementary file 1 [file 4ad7933792e19537c34da0f6.docx]

**Host–Guest Recognition in the Crystalline State: Selective Inclusion of 1,4-Dibromobutane by Bromoethoxy-Functionalized Pillar[5]arenes**

**Mickey Vinodh, Fatemeh H. Alipour and Talal F. Al-Azemi***

*Chemistry Department, Kuwait University, P.O. Box 5969, Safat 13060, Kuwait*

*e-mail: t.alazemi@ku.edu.kw*

**Supporting information**

**Table of Contents** Page No

| **Table S1.** Summary on the nature and various crystallographic parameters of **PBr1.ButBr2 and PBr2.ButBr2** | 2 |
| --- | --- |
| **Table S2.** Summary on the nature and various crystallographic parameters of **PBr4.ButBr2 and PBr6.ButBr2** | 3 |
| **Fig. S1.** Crystal structure of **PBr1.ButBr2** with displacement ellipsoids | 4 |
| **Fig. S2.** Symmetry expanded structure of **PBr2.ButBr2** with displacement ellipsoids | 5 |
| **Fig. S3.** Crystal structure of **PBr4.ButBr2** with displacement ellipsoids | 6 |
| **Fig. S4.** Crystal structure of **PBr6.ButBr2** with displacement ellipsoids | 7 |
| **Table S3**: Non-bonding interactions between pillar[5]arene host and dibromobutane guest in the **PBr1.ButBr2** crystals | 8 |
| **Table S4**: Non-bonding interactions between pillar[5]arene host and dibromobutane guest in the **PBr2.ButBr2** crystals | 8 |
| **Table S5**: Non-bonding interactions between pillar[5]arene host and dibromobutane guest in the **PBr4.ButBr2** crystals | 8 |
| **Table S6**: Non-bonding interactions between pillar[5]arene host and dibromobutane guest in the **PBr6.ButBr2** crystals | 9 |
| **Fig. S5.** Packing pattern of **PBr1.ButBr2** crystals | 10 |
| **Fig. S6.** Packing pattern of **PBr2.ButBr2** crystals | 11 |
| **Fig. S7.** Packing pattern of **PBr4.ButBr2** crystals | 12 |
| **Fig. S8.** Packing pattern of **PBr6.ButBr2** crystals | 13 |
| **CheckCIF_ PBr1.ButBr2** | 14 |
| **CheckCIF_ PBr2.ButBr2** | 17 |
| **CheckCIF_ PBr4.ButBr2** | 20 |
| **CheckCIF_ PBr6.ButBr2** | 23 |

**Table S1.** Summary on the nature and various crystallographic parameters of **PBr1.ButBr2 and PBr2.ButBr2**

| **Crystal sample** | **PBr1.ButBr2** | **PBr2.ButBr2** |
| --- | --- | --- |
| Chemical formula | [C51H61Br4O10](file:///C:\Users\hp\Desktop\Dr.%20Talal\BR_ALL%20BR%20Crystals\BR_ALL%20BR_SELECTED%20FILES_19\PBr1_ButBr2%20_chemical_formula_sum) | [C51H60Br4O10](file:///C:\Users\hp\Desktop\Dr.%20Talal\BR_ALL%20BR%20Crystals\BR_ALL%20BR_SELECTED%20FILES_19\PBr2_ButBr2%20_chemical_formula_sum) |
| *M*r | [1153.63](file:///C:\Users\hp\Desktop\Dr.%20Talal\BR_ALL%20BR%20Crystals\BR_ALL%20BR_SELECTED%20FILES_19\PBr1_ButBr2%20_chemical_formula_weight) | [1152.63](file:///C:\Users\hp\Desktop\Dr.%20Talal\BR_ALL%20BR%20Crystals\BR_ALL%20BR_SELECTED%20FILES_19\PBr2_ButBr2%20_chemical_formula_weight) |
| Crystal system, space group | [Triclinic](file:///C:\Users\hp\Desktop\Dr.%20Talal\BR_ALL%20BR%20Crystals\BR_ALL%20BR_SELECTED%20FILES_19\PBr1_ButBr2%20_space_group_crystal_system), [*P*](file:///C:\Users\hp\Desktop\Dr.%20Talal\BR_ALL%20BR%20Crystals\BR_ALL%20BR_SELECTED%20FILES_19\PBr1_ButBr2%20_space_group_name_H-M_alt)-1 | [Monoclinic](file:///C:\Users\hp\Desktop\Dr.%20Talal\BR_ALL%20BR%20Crystals\BR_ALL%20BR_SELECTED%20FILES_19\PBr2_ButBr2%20_space_group_crystal_system), [*C*2/*c*](file:///C:\Users\hp\Desktop\Dr.%20Talal\BR_ALL%20BR%20Crystals\BR_ALL%20BR_SELECTED%20FILES_19\PBr2_ButBr2%20_space_group_name_H-M_alt) |
| Temperature (K) | [293](file:///C:\Users\hp\Desktop\Dr.%20Talal\BR_ALL%20BR%20Crystals\BR_ALL%20BR_SELECTED%20FILES_19\PBr1_ButBr2%20_cell_measurement_temperature) | [293](file:///C:\Users\hp\Desktop\Dr.%20Talal\BR_ALL%20BR%20Crystals\BR_ALL%20BR_SELECTED%20FILES_19\PBr2_ButBr2%20_cell_measurement_temperature) |
| *a*, *b*, *c* (Å) | [11.9504 (6)](file:///C:\Users\hp\Desktop\Dr.%20Talal\BR_ALL%20BR%20Crystals\BR_ALL%20BR_SELECTED%20FILES_19\PBr1_ButBr2%20_cell_length_a), [12.3790 (5)](file:///C:\Users\hp\Desktop\Dr.%20Talal\BR_ALL%20BR%20Crystals\BR_ALL%20BR_SELECTED%20FILES_19\PBr1_ButBr2%20_cell_length_b), [19.820 (1)](file:///C:\Users\hp\Desktop\Dr.%20Talal\BR_ALL%20BR%20Crystals\BR_ALL%20BR_SELECTED%20FILES_19\PBr1_ButBr2%20_cell_length_c) | [11.147 (6)](file:///C:\Users\hp\Desktop\Dr.%20Talal\BR_ALL%20BR%20Crystals\BR_ALL%20BR_SELECTED%20FILES_19\PBr2_ButBr2%20_cell_length_a), [21.854 (14)](file:///C:\Users\hp\Desktop\Dr.%20Talal\BR_ALL%20BR%20Crystals\BR_ALL%20BR_SELECTED%20FILES_19\PBr2_ButBr2%20_cell_length_b), [21.609 (13)](file:///C:\Users\hp\Desktop\Dr.%20Talal\BR_ALL%20BR%20Crystals\BR_ALL%20BR_SELECTED%20FILES_19\PBr2_ButBr2%20_cell_length_c) |
| α, β, γ (°) | [87.229 (6)](file:///C:\Users\hp\Desktop\Dr.%20Talal\BR_ALL%20BR%20Crystals\BR_ALL%20BR_SELECTED%20FILES_19\PBr1_ButBr2%20_cell_angle_alpha), [85.730 (6)](file:///C:\Users\hp\Desktop\Dr.%20Talal\BR_ALL%20BR%20Crystals\BR_ALL%20BR_SELECTED%20FILES_19\PBr1_ButBr2%20_cell_angle_beta), [61.925 (4)](file:///C:\Users\hp\Desktop\Dr.%20Talal\BR_ALL%20BR%20Crystals\BR_ALL%20BR_SELECTED%20FILES_19\PBr1_ButBr2%20_cell_angle_gamma) | [104.819 (9)](file:///C:\Users\hp\Desktop\Dr.%20Talal\BR_ALL%20BR%20Crystals\BR_ALL%20BR_SELECTED%20FILES_19\PBr2_ButBr2%20_cell_angle_beta) |
| *V* (Å3) | [2579.6 (2)](file:///C:\Users\hp\Desktop\Dr.%20Talal\BR_ALL%20BR%20Crystals\BR_ALL%20BR_SELECTED%20FILES_19\PBr1_ButBr2%20_cell_volume) | [5089 (5)](file:///C:\Users\hp\Desktop\Dr.%20Talal\BR_ALL%20BR%20Crystals\BR_ALL%20BR_SELECTED%20FILES_19\PBr2_ButBr2%20_cell_volume) |
| *Z* | [2](file:///C:\Users\hp\Desktop\Dr.%20Talal\BR_ALL%20BR%20Crystals\BR_ALL%20BR_SELECTED%20FILES_19\PBr1_ButBr2%20_cell_formula_units_Z) | [4](file:///C:\Users\hp\Desktop\Dr.%20Talal\BR_ALL%20BR%20Crystals\BR_ALL%20BR_SELECTED%20FILES_19\PBr2_ButBr2%20_cell_formula_units_Z) |
| Radiation type | [Mo *K*α](file:///C:\Users\hp\Desktop\Dr.%20Talal\BR_ALL%20BR%20Crystals\BR_ALL%20BR_SELECTED%20FILES_19\PBr1_ButBr2%20_diffrn_radiation_type) | [Mo *K*α](file:///C:\Users\hp\Desktop\Dr.%20Talal\BR_ALL%20BR%20Crystals\BR_ALL%20BR_SELECTED%20FILES_19\PBr2_ButBr2%20_diffrn_radiation_type) |
| µ (mm−1) | [3.18](file:///C:\Users\hp\Desktop\Dr.%20Talal\BR_ALL%20BR%20Crystals\BR_ALL%20BR_SELECTED%20FILES_19\PBr1_ButBr2%20_exptl_absorpt_coefficient_mu) | [3.22](file:///C:\Users\hp\Desktop\Dr.%20Talal\BR_ALL%20BR%20Crystals\BR_ALL%20BR_SELECTED%20FILES_19\PBr2_ButBr2%20_exptl_absorpt_coefficient_mu) |
| Crystal size (mm) | [0.15](file:///C:\Users\hp\Desktop\Dr.%20Talal\BR_ALL%20BR%20Crystals\BR_ALL%20BR_SELECTED%20FILES_19\PBr1_ButBr2%20_exptl_crystal_size_max) × [0.12](file:///C:\Users\hp\Desktop\Dr.%20Talal\BR_ALL%20BR%20Crystals\BR_ALL%20BR_SELECTED%20FILES_19\PBr1_ButBr2%20_exptl_crystal_size_mid) × [0.08](file:///C:\Users\hp\Desktop\Dr.%20Talal\BR_ALL%20BR%20Crystals\BR_ALL%20BR_SELECTED%20FILES_19\PBr1_ButBr2%20_exptl_crystal_size_min) | [0.20](file:///C:\Users\hp\Desktop\Dr.%20Talal\BR_ALL%20BR%20Crystals\BR_ALL%20BR_SELECTED%20FILES_19\PBr2_ButBr2%20_exptl_crystal_size_max) × [0.20](file:///C:\Users\hp\Desktop\Dr.%20Talal\BR_ALL%20BR%20Crystals\BR_ALL%20BR_SELECTED%20FILES_19\PBr2_ButBr2%20_exptl_crystal_size_mid) × [0.11](file:///C:\Users\hp\Desktop\Dr.%20Talal\BR_ALL%20BR%20Crystals\BR_ALL%20BR_SELECTED%20FILES_19\PBr2_ButBr2%20_exptl_crystal_size_min) |
| Diffractometer | [Rigaku R-AXIS RAPID](file:///C:\Users\hp\Desktop\Dr.%20Talal\BR_ALL%20BR%20Crystals\BR_ALL%20BR_SELECTED%20FILES_19\PBr1_ButBr2%20_diffrn_measurement_device_type) | [Rigaku R-AXIS RAPID](file:///C:\Users\hp\Desktop\Dr.%20Talal\BR_ALL%20BR%20Crystals\BR_ALL%20BR_SELECTED%20FILES_19\PBr2_ButBr2%20_diffrn_measurement_device_type) |
| Absorption correction | [Multi-scan](file:///C:\Users\hp\Desktop\Dr.%20Talal\BR_ALL%20BR%20Crystals\BR_ALL%20BR_SELECTED%20FILES_19\PBr1_ButBr2%20_exptl_absorpt_correction_type)  [*ABSCOR* (Rigaku, 1995)](file:///C:\Users\hp\Desktop\Dr.%20Talal\BR_ALL%20BR%20Crystals\BR_ALL%20BR_SELECTED%20FILES_19\PBr1_ButBr2%20_exptl_absorpt_process_details) | [Multi-scan](file:///C:\Users\hp\Desktop\Dr.%20Talal\BR_ALL%20BR%20Crystals\BR_ALL%20BR_SELECTED%20FILES_19\PBr2_ButBr2%20_exptl_absorpt_correction_type)  [*ABSCOR* (Rigaku, 1995)](file:///C:\Users\hp\Desktop\Dr.%20Talal\BR_ALL%20BR%20Crystals\BR_ALL%20BR_SELECTED%20FILES_19\PBr2_ButBr2%20_exptl_absorpt_process_details) |
| *T*min, Tmax | [0.464](file:///C:\Users\hp\Desktop\Dr.%20Talal\BR_ALL%20BR%20Crystals\BR_ALL%20BR_SELECTED%20FILES_19\PBr1_ButBr2%20_exptl_absorpt_correction_T_min), [0.789](file:///C:\Users\hp\Desktop\Dr.%20Talal\BR_ALL%20BR%20Crystals\BR_ALL%20BR_SELECTED%20FILES_19\PBr1_ButBr2%20_exptl_absorpt_correction_T_max) | [0.444](file:///C:\Users\hp\Desktop\Dr.%20Talal\BR_ALL%20BR%20Crystals\BR_ALL%20BR_SELECTED%20FILES_19\PBr2_ButBr2%20_exptl_absorpt_correction_T_min), [0.749](file:///C:\Users\hp\Desktop\Dr.%20Talal\BR_ALL%20BR%20Crystals\BR_ALL%20BR_SELECTED%20FILES_19\PBr2_ButBr2%20_exptl_absorpt_correction_T_max) |
| No. of measured, independent & observed [*I* > 2σ(*I*)] reflections | [30699](file:///C:\Users\hp\Desktop\Dr.%20Talal\BR_ALL%20BR%20Crystals\BR_ALL%20BR_SELECTED%20FILES_19\PBr1_ButBr2%20_diffrn_reflns_number), [9065](file:///C:\Users\hp\Desktop\Dr.%20Talal\BR_ALL%20BR%20Crystals\BR_ALL%20BR_SELECTED%20FILES_19\PBr1_ButBr2%20_reflns_number_total), [4185](file:///C:\Users\hp\Desktop\Dr.%20Talal\BR_ALL%20BR%20Crystals\BR_ALL%20BR_SELECTED%20FILES_19\PBr1_ButBr2%20_reflns_number_gt) | [14748](file:///C:\Users\hp\Desktop\Dr.%20Talal\BR_ALL%20BR%20Crystals\BR_ALL%20BR_SELECTED%20FILES_19\PBr2_ButBr2%20_diffrn_reflns_number), [4465](file:///C:\Users\hp\Desktop\Dr.%20Talal\BR_ALL%20BR%20Crystals\BR_ALL%20BR_SELECTED%20FILES_19\PBr2_ButBr2%20_reflns_number_total), [1888](file:///C:\Users\hp\Desktop\Dr.%20Talal\BR_ALL%20BR%20Crystals\BR_ALL%20BR_SELECTED%20FILES_19\PBr2_ButBr2%20_reflns_number_gt) |
| *R*int | [0.068](file:///C:\Users\hp\Desktop\Dr.%20Talal\BR_ALL%20BR%20Crystals\BR_ALL%20BR_SELECTED%20FILES_19\PBr1_ButBr2%20_diffrn_reflns_av_R_equivalents) | [0.096](file:///C:\Users\hp\Desktop\Dr.%20Talal\BR_ALL%20BR%20Crystals\BR_ALL%20BR_SELECTED%20FILES_19\PBr2_ButBr2%20_diffrn_reflns_av_R_equivalents) |
| (sin θ/λ)max (Å−1) | 0.595 | 0.595 |
| *R*[F2 > 2σ(F2)], wR(F2), S | [0.096](file:///C:\Users\hp\Desktop\Dr.%20Talal\BR_ALL%20BR%20Crystals\BR_ALL%20BR_SELECTED%20FILES_19\PBr1_ButBr2%20_refine_ls_R_factor_gt), [0.333](file:///C:\Users\hp\Desktop\Dr.%20Talal\BR_ALL%20BR%20Crystals\BR_ALL%20BR_SELECTED%20FILES_19\PBr1_ButBr2%20_refine_ls_wR_factor_ref), [1.02](file:///C:\Users\hp\Desktop\Dr.%20Talal\BR_ALL%20BR%20Crystals\BR_ALL%20BR_SELECTED%20FILES_19\PBr1_ButBr2%20_refine_ls_goodness_of_fit_ref) | [0.077](file:///C:\Users\hp\Desktop\Dr.%20Talal\BR_ALL%20BR%20Crystals\BR_ALL%20BR_SELECTED%20FILES_19\PBr2_ButBr2%20_refine_ls_R_factor_gt), [0.303](file:///C:\Users\hp\Desktop\Dr.%20Talal\BR_ALL%20BR%20Crystals\BR_ALL%20BR_SELECTED%20FILES_19\PBr2_ButBr2%20_refine_ls_wR_factor_ref), [0.93](file:///C:\Users\hp\Desktop\Dr.%20Talal\BR_ALL%20BR%20Crystals\BR_ALL%20BR_SELECTED%20FILES_19\PBr2_ButBr2%20_refine_ls_goodness_of_fit_ref) |
| No. of reflections | [9065](file:///C:\Users\hp\Desktop\Dr.%20Talal\BR_ALL%20BR%20Crystals\BR_ALL%20BR_SELECTED%20FILES_19\PBr1_ButBr2%20_refine_ls_number_reflns) | [4465](file:///C:\Users\hp\Desktop\Dr.%20Talal\BR_ALL%20BR%20Crystals\BR_ALL%20BR_SELECTED%20FILES_19\PBr2_ButBr2%20_refine_ls_number_reflns) |
| No. of parameters | [649](file:///C:\Users\hp\Desktop\Dr.%20Talal\BR_ALL%20BR%20Crystals\BR_ALL%20BR_SELECTED%20FILES_19\PBr1_ButBr2%20_refine_ls_number_parameters) | [372](file:///C:\Users\hp\Desktop\Dr.%20Talal\BR_ALL%20BR%20Crystals\BR_ALL%20BR_SELECTED%20FILES_19\PBr2_ButBr2%20_refine_ls_number_parameters) |
| No. of restraints | [174](file:///C:\Users\hp\Desktop\Dr.%20Talal\BR_ALL%20BR%20Crystals\BR_ALL%20BR_SELECTED%20FILES_19\PBr1_ButBr2%20_refine_ls_number_restraints) | [205](file:///C:\Users\hp\Desktop\Dr.%20Talal\BR_ALL%20BR%20Crystals\BR_ALL%20BR_SELECTED%20FILES_19\PBr2_ButBr2%20_refine_ls_number_restraints) |
| H-atom treatment | [Constrained](file:///C:\Users\hp\Desktop\crystal%20data\19\Dr.%20Saad\Basma-Small_16-4-19\shelxl%20_refine_ls_hydrogen_treatment) | [Constrained](file:///C:\Users\hp\Desktop\crystal%20data\19\Dr.%20Saad\Basma-Small_16-4-19\shelxl%20_refine_ls_hydrogen_treatment) |
| Δρmax, Δρmin (e Å−3) | [1.15](file:///C:\Users\hp\Desktop\Dr.%20Talal\BR_ALL%20BR%20Crystals\BR_ALL%20BR_SELECTED%20FILES_19\PBr1_ButBr2%20_refine_diff_density_max), [−0.96](file:///C:\Users\hp\Desktop\Dr.%20Talal\BR_ALL%20BR%20Crystals\BR_ALL%20BR_SELECTED%20FILES_19\PBr1_ButBr2%20_refine_diff_density_min) | [0.50](file:///C:\Users\hp\Desktop\Dr.%20Talal\BR_ALL%20BR%20Crystals\BR_ALL%20BR_SELECTED%20FILES_19\PBr2_ButBr2%20_refine_diff_density_max), [−0.63](file:///C:\Users\hp\Desktop\Dr.%20Talal\BR_ALL%20BR%20Crystals\BR_ALL%20BR_SELECTED%20FILES_19\PBr2_ButBr2%20_refine_diff_density_min) |

**Table S2.** Summary on the nature and various crystallographic parameters of **PBr4.ButBr2 and PBr6.ButBr2**

| **Crystal sample** | **PBr4.ButBr2** | **PBr6.ButBr2** |
| --- | --- | --- |
| Chemical formula | [C56H68Br7O10](file:///C:\Users\hp\Desktop\Dr.%20Talal\BR_ALL%20BR%20Crystals\BR_ALL%20BR_SELECTED%20FILES_19\PBr4_ButBr2%20_chemical_formula_sum) | [C55H64Br8O10](file:///C:\Users\hp\Desktop\Dr.%20Talal\BR_ALL%20BR%20Crystals\BR_ALL%20BR_SELECTED%20FILES_19\PBr6_ButBr2%20_chemical_formula_sum) |
| *M*r | [1460.47](file:///C:\Users\hp\Desktop\Dr.%20Talal\BR_ALL%20BR%20Crystals\BR_ALL%20BR_SELECTED%20FILES_19\PBr4_ButBr2%20_chemical_formula_weight) | [1524.34](file:///C:\Users\hp\Desktop\Dr.%20Talal\BR_ALL%20BR%20Crystals\BR_ALL%20BR_SELECTED%20FILES_19\PBr6_ButBr2%20_chemical_formula_weight) |
| Crystal system, space group | [Triclinic](file:///C:\Users\hp\Desktop\Dr.%20Talal\BR_ALL%20BR%20Crystals\BR_ALL%20BR_SELECTED%20FILES_19\PBr1_ButBr2%20_space_group_crystal_system), [*P*](file:///C:\Users\hp\Desktop\Dr.%20Talal\BR_ALL%20BR%20Crystals\BR_ALL%20BR_SELECTED%20FILES_19\PBr1_ButBr2%20_space_group_name_H-M_alt)-1 | [Orthorhombic](file:///C:\Users\hp\Desktop\Dr.%20Talal\BR_ALL%20BR%20Crystals\BR_ALL%20BR_SELECTED%20FILES_19\PBr6_ButBr2%20_space_group_crystal_system), [*Aba*2](file:///C:\Users\hp\Desktop\Dr.%20Talal\BR_ALL%20BR%20Crystals\BR_ALL%20BR_SELECTED%20FILES_19\PBr6_ButBr2%20_space_group_name_H-M_alt) |
| Temperature (K) | [296](file:///C:\Users\hp\Desktop\Dr.%20Talal\BR_ALL%20BR%20Crystals\BR_ALL%20BR_SELECTED%20FILES_19\PBr4_ButBr2%20_cell_measurement_temperature) | [296](file:///C:\Users\hp\Desktop\Dr.%20Talal\BR_ALL%20BR%20Crystals\BR_ALL%20BR_SELECTED%20FILES_19\PBr6_ButBr2%20_cell_measurement_temperature) |
| *a*, *b*, *c* (Å) | [12.491 (2)](file:///C:\Users\hp\Desktop\Dr.%20Talal\BR_ALL%20BR%20Crystals\BR_ALL%20BR_SELECTED%20FILES_19\PBr4_ButBr2%20_cell_length_a), [12.859 (3)](file:///C:\Users\hp\Desktop\Dr.%20Talal\BR_ALL%20BR%20Crystals\BR_ALL%20BR_SELECTED%20FILES_19\PBr4_ButBr2%20_cell_length_b), [19.944 (4)](file:///C:\Users\hp\Desktop\Dr.%20Talal\BR_ALL%20BR%20Crystals\BR_ALL%20BR_SELECTED%20FILES_19\PBr4_ButBr2%20_cell_length_c) | [41.472 (5)](file:///C:\Users\hp\Desktop\Dr.%20Talal\BR_ALL%20BR%20Crystals\BR_ALL%20BR_SELECTED%20FILES_19\PBr6_ButBr2%20_cell_length_a), [17.4570 (17)](file:///C:\Users\hp\Desktop\Dr.%20Talal\BR_ALL%20BR%20Crystals\BR_ALL%20BR_SELECTED%20FILES_19\PBr6_ButBr2%20_cell_length_b), [16.6459 (17)](file:///C:\Users\hp\Desktop\Dr.%20Talal\BR_ALL%20BR%20Crystals\BR_ALL%20BR_SELECTED%20FILES_19\PBr6_ButBr2%20_cell_length_c) |
| α, β, γ (°) | [94.148 (10)](file:///C:\Users\hp\Desktop\Dr.%20Talal\BR_ALL%20BR%20Crystals\BR_ALL%20BR_SELECTED%20FILES_19\PBr4_ButBr2%20_cell_angle_alpha), [93.140 (9)](file:///C:\Users\hp\Desktop\Dr.%20Talal\BR_ALL%20BR%20Crystals\BR_ALL%20BR_SELECTED%20FILES_19\PBr4_ButBr2%20_cell_angle_beta), [111.521 (8)](file:///C:\Users\hp\Desktop\Dr.%20Talal\BR_ALL%20BR%20Crystals\BR_ALL%20BR_SELECTED%20FILES_19\PBr4_ButBr2%20_cell_angle_gamma) |  |
| *V* (Å3) | [2961.0 (10)](file:///C:\Users\hp\Desktop\Dr.%20Talal\BR_ALL%20BR%20Crystals\BR_ALL%20BR_SELECTED%20FILES_19\PBr4_ButBr2%20_cell_volume) | [12051 (2)](file:///C:\Users\hp\Desktop\Dr.%20Talal\BR_ALL%20BR%20Crystals\BR_ALL%20BR_SELECTED%20FILES_19\PBr6_ButBr2%20_cell_volume) |
| *Z* | [2](file:///C:\Users\hp\Desktop\Dr.%20Talal\BR_ALL%20BR%20Crystals\BR_ALL%20BR_SELECTED%20FILES_19\PBr4_ButBr2%20_cell_formula_units_Z) | [8](file:///C:\Users\hp\Desktop\Dr.%20Talal\BR_ALL%20BR%20Crystals\BR_ALL%20BR_SELECTED%20FILES_19\PBr6_ButBr2%20_cell_formula_units_Z) |
| Radiation type | [Cu *K*α](file:///C:\Users\hp\Desktop\Dr.%20Talal\BR_ALL%20BR%20Crystals\BR_ALL%20BR_SELECTED%20FILES_19\PBr4_ButBr2%20_diffrn_radiation_type) | [Cu *K*α](file:///C:\Users\hp\Desktop\Dr.%20Talal\BR_ALL%20BR%20Crystals\BR_ALL%20BR_SELECTED%20FILES_19\PBr6_ButBr2%20_diffrn_radiation_type) |
| µ (mm−1) | [6.13](file:///C:\Users\hp\Desktop\Dr.%20Talal\BR_ALL%20BR%20Crystals\BR_ALL%20BR_SELECTED%20FILES_19\PBr4_ButBr2%20_exptl_absorpt_coefficient_mu) | [6.80](file:///C:\Users\hp\Desktop\Dr.%20Talal\BR_ALL%20BR%20Crystals\BR_ALL%20BR_SELECTED%20FILES_19\PBr6_ButBr2%20_exptl_absorpt_coefficient_mu) |
| Crystal size (mm) | [0.21](file:///C:\Users\hp\Desktop\Dr.%20Talal\BR_ALL%20BR%20Crystals\BR_ALL%20BR_SELECTED%20FILES_19\PBr4_ButBr2%20_exptl_crystal_size_max) × [0.19](file:///C:\Users\hp\Desktop\Dr.%20Talal\BR_ALL%20BR%20Crystals\BR_ALL%20BR_SELECTED%20FILES_19\PBr4_ButBr2%20_exptl_crystal_size_mid) × [0.17](file:///C:\Users\hp\Desktop\Dr.%20Talal\BR_ALL%20BR%20Crystals\BR_ALL%20BR_SELECTED%20FILES_19\PBr4_ButBr2%20_exptl_crystal_size_min) | [0.21](file:///C:\Users\hp\Desktop\Dr.%20Talal\BR_ALL%20BR%20Crystals\BR_ALL%20BR_SELECTED%20FILES_19\PBr6_ButBr2%20_exptl_crystal_size_max) × [0.17](file:///C:\Users\hp\Desktop\Dr.%20Talal\BR_ALL%20BR%20Crystals\BR_ALL%20BR_SELECTED%20FILES_19\PBr6_ButBr2%20_exptl_crystal_size_mid) × [0.11](file:///C:\Users\hp\Desktop\Dr.%20Talal\BR_ALL%20BR%20Crystals\BR_ALL%20BR_SELECTED%20FILES_19\PBr6_ButBr2%20_exptl_crystal_size_min) |
| Diffractometer | [Bruker *APEX*-II CCD](file:///C:\Users\hp\Desktop\Dr.%20Talal\BR_ALL%20BR%20Crystals\BR_ALL%20BR_SELECTED%20FILES_19\PBr4_ButBr2%20_diffrn_measurement_device_type) | [Bruker *APEX*-II CCD](file:///C:\Users\hp\Desktop\Dr.%20Talal\BR_ALL%20BR%20Crystals\BR_ALL%20BR_SELECTED%20FILES_19\PBr6_ButBr2%20_diffrn_measurement_device_type) |
| Absorption correction | [Multi-scan](file:///C:\Users\hp\Desktop\Dr.%20Talal\BR_ALL%20BR%20Crystals\BR_ALL%20BR_SELECTED%20FILES_19\PBr4_ButBr2%20_exptl_absorpt_correction_type)  [*SADABS2016*/2 - Bruker AXS area detector scaling and absorption correction](file:///C:\Users\hp\Desktop\Dr.%20Talal\BR_ALL%20BR%20Crystals\BR_ALL%20BR_SELECTED%20FILES_19\PBr4_ButBr2%20_exptl_absorpt_process_details) | [Multi-scan](file:///C:\Users\hp\Desktop\Dr.%20Talal\BR_ALL%20BR%20Crystals\BR_ALL%20BR_SELECTED%20FILES_19\PBr6_ButBr2%20_exptl_absorpt_correction_type)  [*SADABS2016*/2 - Bruker AXS area detector scaling and absorption correction](file:///C:\Users\hp\Desktop\Dr.%20Talal\BR_ALL%20BR%20Crystals\BR_ALL%20BR_SELECTED%20FILES_19\PBr6_ButBr2%20_exptl_absorpt_process_details) |
| *T*min, Tmax | [0.31](file:///C:\Users\hp\Desktop\Dr.%20Talal\BR_ALL%20BR%20Crystals\BR_ALL%20BR_SELECTED%20FILES_19\PBr4_ButBr2%20_exptl_absorpt_correction_T_min), [0.62](file:///C:\Users\hp\Desktop\Dr.%20Talal\BR_ALL%20BR%20Crystals\BR_ALL%20BR_SELECTED%20FILES_19\PBr4_ButBr2%20_exptl_absorpt_correction_T_max) | [0.33](file:///C:\Users\hp\Desktop\Dr.%20Talal\BR_ALL%20BR%20Crystals\BR_ALL%20BR_SELECTED%20FILES_19\PBr6_ButBr2%20_exptl_absorpt_correction_T_min), [0.64](file:///C:\Users\hp\Desktop\Dr.%20Talal\BR_ALL%20BR%20Crystals\BR_ALL%20BR_SELECTED%20FILES_19\PBr6_ButBr2%20_exptl_absorpt_correction_T_max) |
| No. of measured, independent & observed [*I* > 2σ(*I*)] reflections | [43527](file:///C:\Users\hp\Desktop\Dr.%20Talal\BR_ALL%20BR%20Crystals\BR_ALL%20BR_SELECTED%20FILES_19\PBr4_ButBr2%20_diffrn_reflns_number), [10517](file:///C:\Users\hp\Desktop\Dr.%20Talal\BR_ALL%20BR%20Crystals\BR_ALL%20BR_SELECTED%20FILES_19\PBr4_ButBr2%20_reflns_number_total), [7640](file:///C:\Users\hp\Desktop\Dr.%20Talal\BR_ALL%20BR%20Crystals\BR_ALL%20BR_SELECTED%20FILES_19\PBr4_ButBr2%20_reflns_number_gt) | [17083](file:///C:\Users\hp\Desktop\Dr.%20Talal\BR_ALL%20BR%20Crystals\BR_ALL%20BR_SELECTED%20FILES_19\PBr6_ButBr2%20_diffrn_reflns_number), [9315](file:///C:\Users\hp\Desktop\Dr.%20Talal\BR_ALL%20BR%20Crystals\BR_ALL%20BR_SELECTED%20FILES_19\PBr6_ButBr2%20_reflns_number_total), [8406](file:///C:\Users\hp\Desktop\Dr.%20Talal\BR_ALL%20BR%20Crystals\BR_ALL%20BR_SELECTED%20FILES_19\PBr6_ButBr2%20_reflns_number_gt) |
| *R*int | [0.054](file:///C:\Users\hp\Desktop\Dr.%20Talal\BR_ALL%20BR%20Crystals\BR_ALL%20BR_SELECTED%20FILES_19\PBr4_ButBr2%20_diffrn_reflns_av_R_equivalents) | [0.041](file:///C:\Users\hp\Desktop\Dr.%20Talal\BR_ALL%20BR%20Crystals\BR_ALL%20BR_SELECTED%20FILES_19\PBr6_ButBr2%20_diffrn_reflns_av_R_equivalents) |
| (sin θ/λ)max (Å−1) | 0.599 | 0.596 |
| *R*[F2 > 2σ(F2)], wR(F2), S | [0.091](file:///C:\Users\hp\Desktop\Dr.%20Talal\BR_ALL%20BR%20Crystals\BR_ALL%20BR_SELECTED%20FILES_19\PBr4_ButBr2%20_refine_ls_R_factor_gt), [0.293](file:///C:\Users\hp\Desktop\Dr.%20Talal\BR_ALL%20BR%20Crystals\BR_ALL%20BR_SELECTED%20FILES_19\PBr4_ButBr2%20_refine_ls_wR_factor_ref), [1.04](file:///C:\Users\hp\Desktop\Dr.%20Talal\BR_ALL%20BR%20Crystals\BR_ALL%20BR_SELECTED%20FILES_19\PBr4_ButBr2%20_refine_ls_goodness_of_fit_ref) | [0.075](file:///C:\Users\hp\Desktop\Dr.%20Talal\BR_ALL%20BR%20Crystals\BR_ALL%20BR_SELECTED%20FILES_19\PBr6_ButBr2%20_refine_ls_R_factor_gt), [0.225](file:///C:\Users\hp\Desktop\Dr.%20Talal\BR_ALL%20BR%20Crystals\BR_ALL%20BR_SELECTED%20FILES_19\PBr6_ButBr2%20_refine_ls_wR_factor_ref), [1.04](file:///C:\Users\hp\Desktop\Dr.%20Talal\BR_ALL%20BR%20Crystals\BR_ALL%20BR_SELECTED%20FILES_19\PBr6_ButBr2%20_refine_ls_goodness_of_fit_ref) |
| No. of reflections | [10517](file:///C:\Users\hp\Desktop\Dr.%20Talal\BR_ALL%20BR%20Crystals\BR_ALL%20BR_SELECTED%20FILES_19\PBr4_ButBr2%20_refine_ls_number_reflns) | [9315](file:///C:\Users\hp\Desktop\Dr.%20Talal\BR_ALL%20BR%20Crystals\BR_ALL%20BR_SELECTED%20FILES_19\PBr6_ButBr2%20_refine_ls_number_reflns) |
| No. of parameters | [706](file:///C:\Users\hp\Desktop\Dr.%20Talal\BR_ALL%20BR%20Crystals\BR_ALL%20BR_SELECTED%20FILES_19\PBr4_ButBr2%20_refine_ls_number_parameters) | [659](file:///C:\Users\hp\Desktop\Dr.%20Talal\BR_ALL%20BR%20Crystals\BR_ALL%20BR_SELECTED%20FILES_19\PBr6_ButBr2%20_refine_ls_number_parameters) |
| No. of restraints | [197](file:///C:\Users\hp\Desktop\Dr.%20Talal\BR_ALL%20BR%20Crystals\BR_ALL%20BR_SELECTED%20FILES_19\PBr4_ButBr2%20_refine_ls_number_restraints) | [49](file:///C:\Users\hp\Desktop\Dr.%20Talal\BR_ALL%20BR%20Crystals\BR_ALL%20BR_SELECTED%20FILES_19\PBr6_ButBr2%20_refine_ls_number_restraints) |
| H-atom treatment | [Constrained](file:///C:\Users\hp\Desktop\crystal%20data\19\Dr.%20Saad\Basma-Small_16-4-19\shelxl%20_refine_ls_hydrogen_treatment) | [Constrained](file:///C:\Users\hp\Desktop\crystal%20data\19\Dr.%20Saad\Basma-Small_16-4-19\shelxl%20_refine_ls_hydrogen_treatment) |
| Δρmax, Δρmin (e Å−3) | [1.46](file:///C:\Users\hp\Desktop\Dr.%20Talal\BR_ALL%20BR%20Crystals\BR_ALL%20BR_SELECTED%20FILES_19\PBr4_ButBr2%20_refine_diff_density_max), [−1.21](file:///C:\Users\hp\Desktop\Dr.%20Talal\BR_ALL%20BR%20Crystals\BR_ALL%20BR_SELECTED%20FILES_19\PBr4_ButBr2%20_refine_diff_density_min) | [1.32](file:///C:\Users\hp\Desktop\Dr.%20Talal\BR_ALL%20BR%20Crystals\BR_ALL%20BR_SELECTED%20FILES_19\PBr6_ButBr2%20_refine_diff_density_max), [−0.64](file:///C:\Users\hp\Desktop\Dr.%20Talal\BR_ALL%20BR%20Crystals\BR_ALL%20BR_SELECTED%20FILES_19\PBr6_ButBr2%20_refine_diff_density_min) |


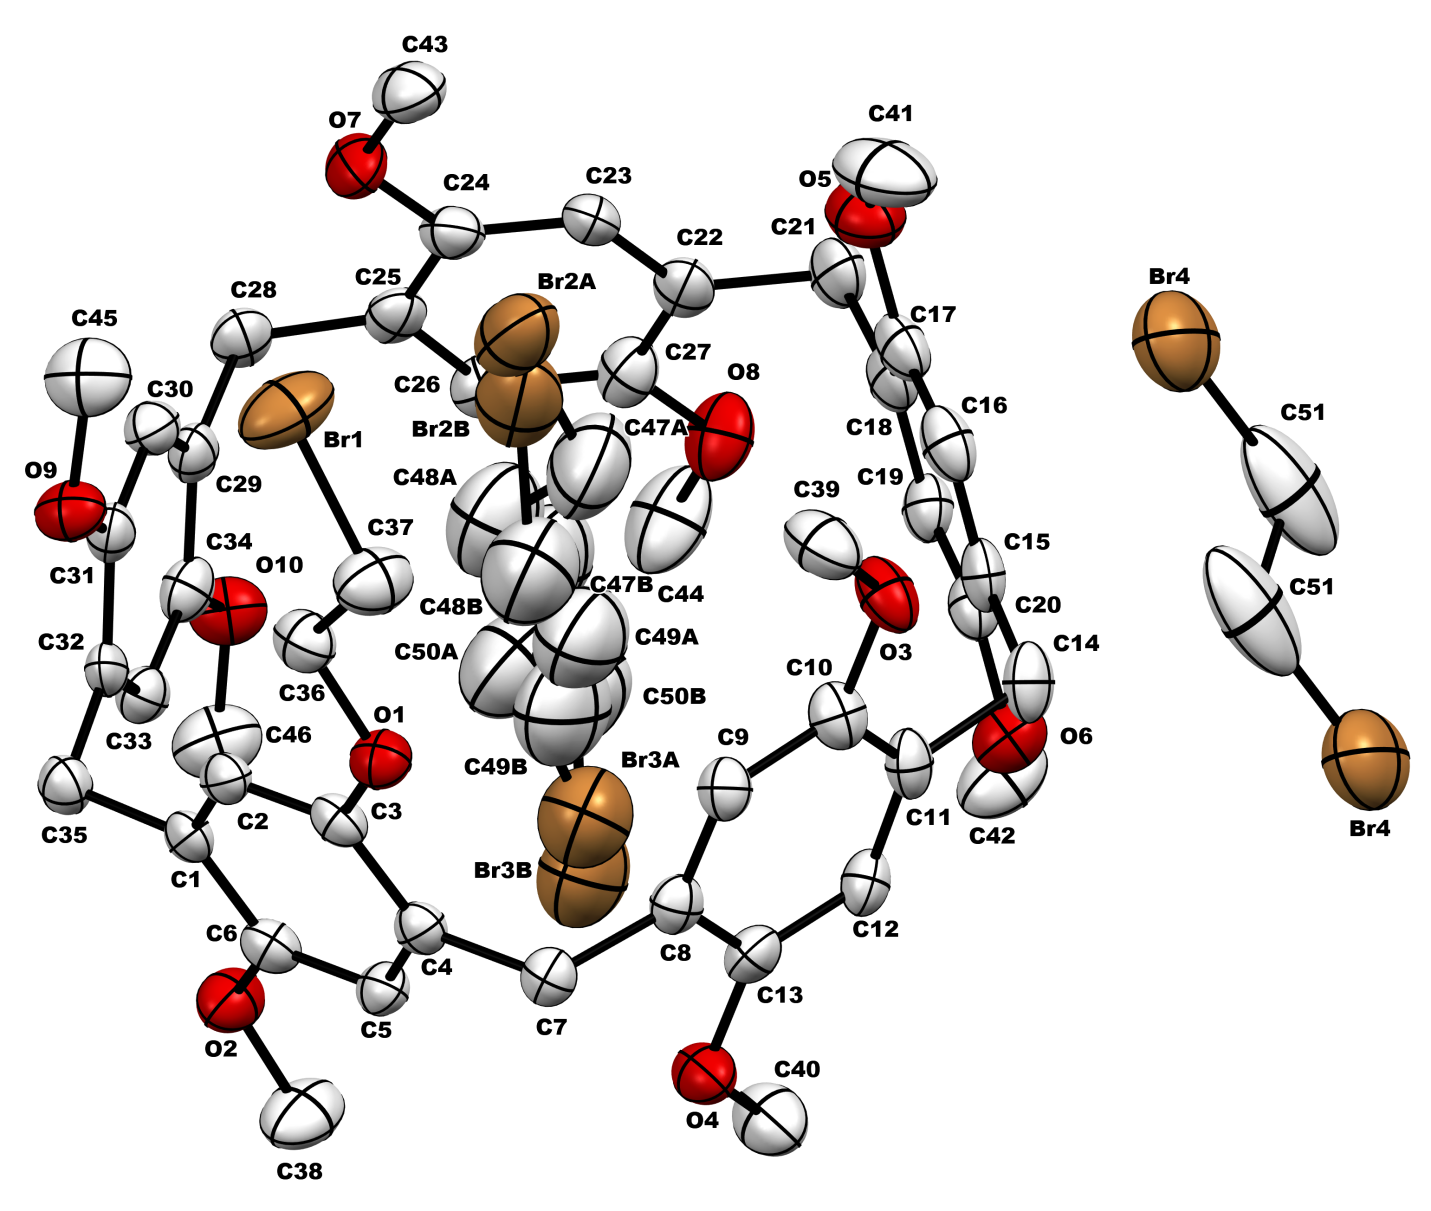


**Fig. S1.** Crystal structure of **PBr1.ButBr2** with displacement ellipsoids (30% probability). Hydrogen atoms are omitted for clarity.

**
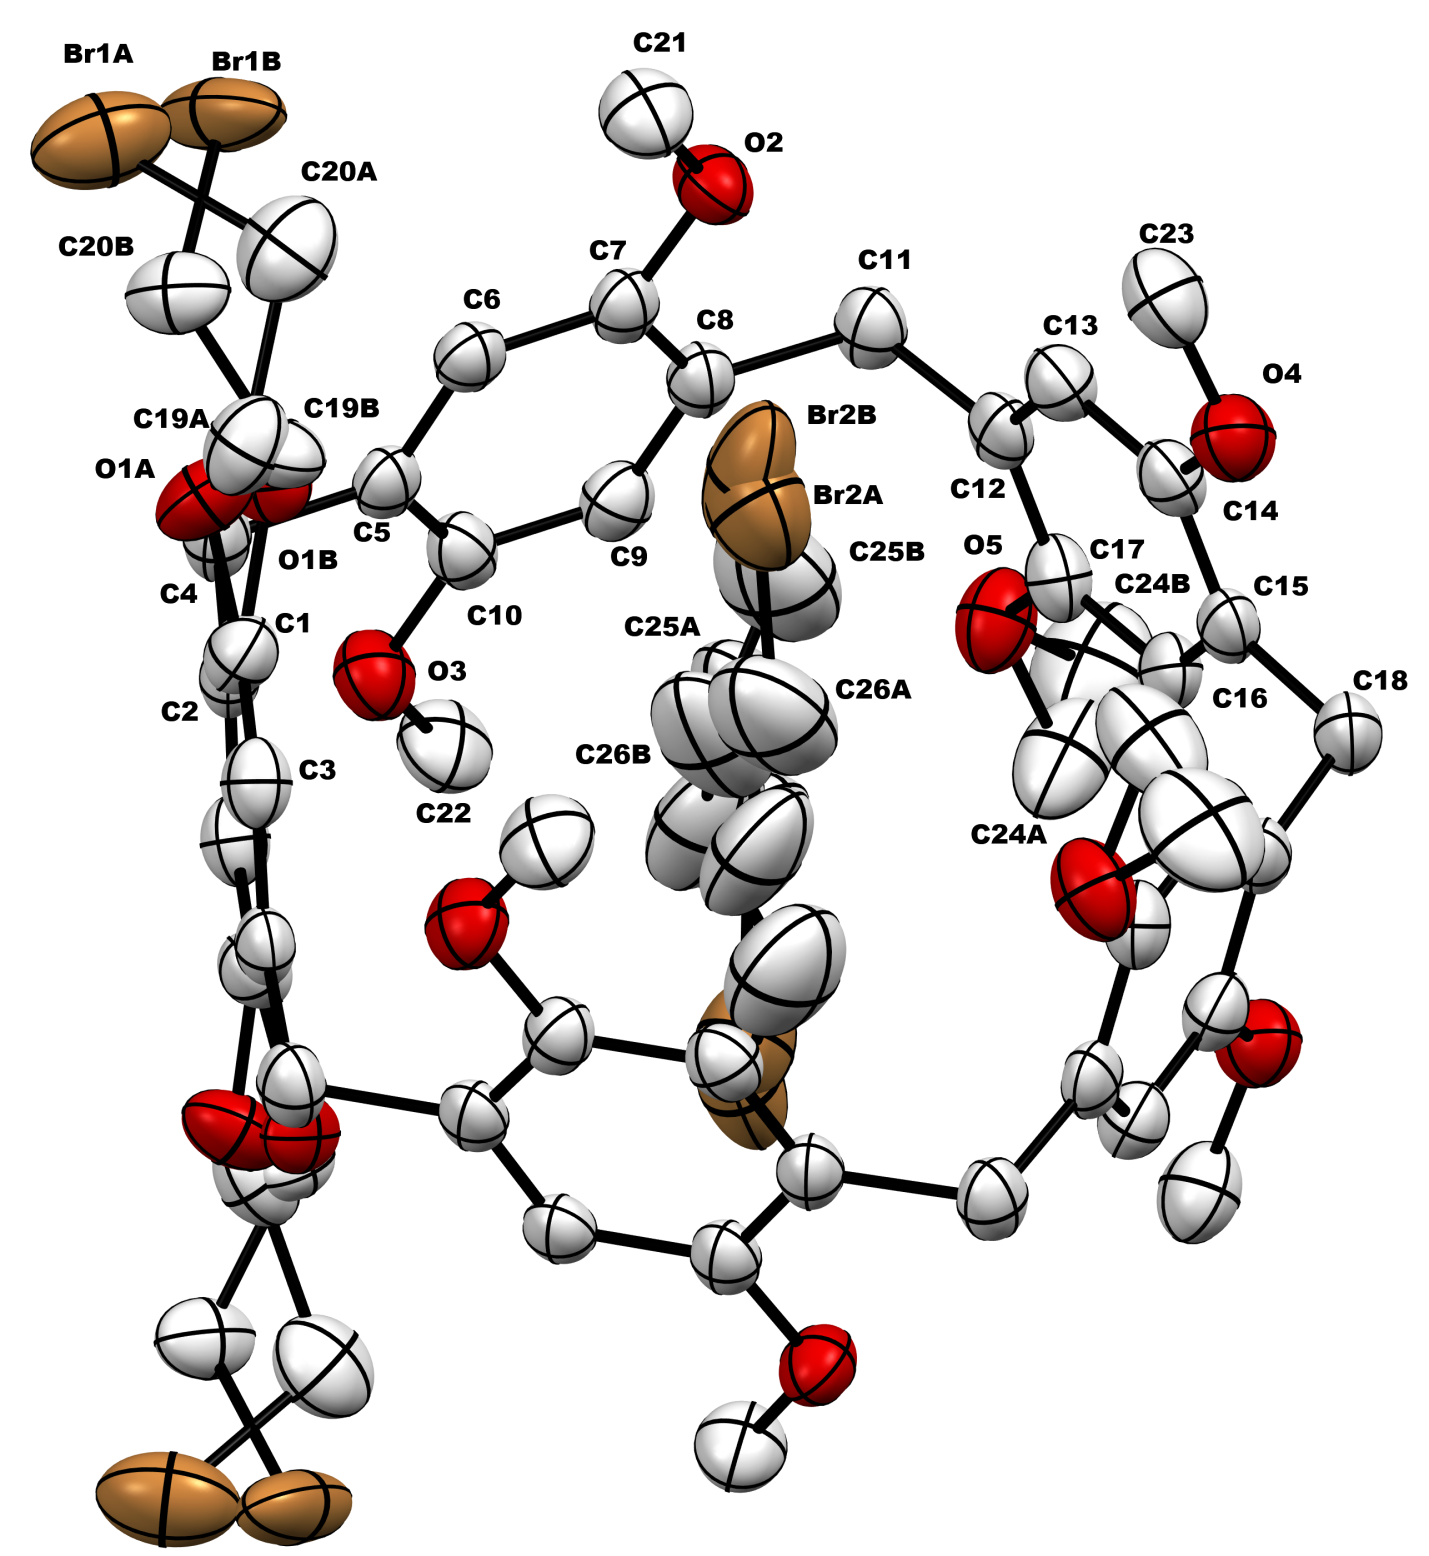
**

**Fig. S2.** Symmetry expanded crystal structure of **PBr2.ButBr2** with displacement ellipsoids (30% probability; labeled only the symmetry independent atoms). Hydrogen atoms are omitted for clarity.

**
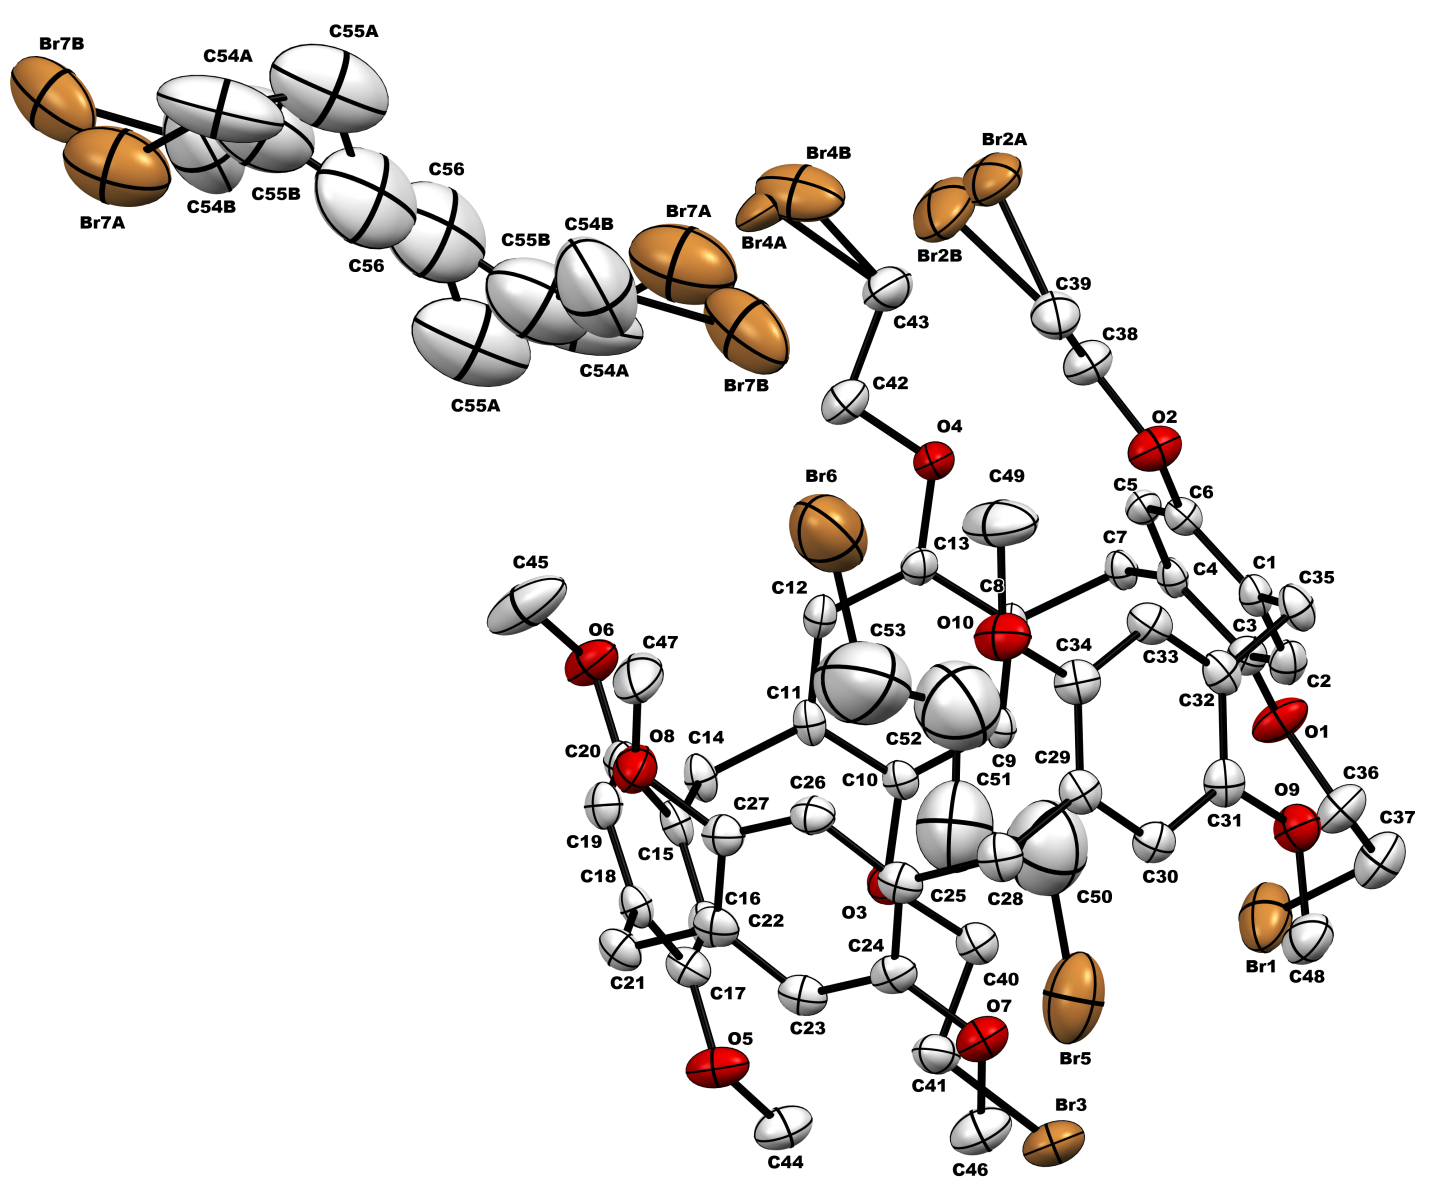
**

**Fig. S3.** Crystal structure of **PBr4.ButBr2** with displacement ellipsoids (30% probability). Hydrogen atoms are omitted for clarity.


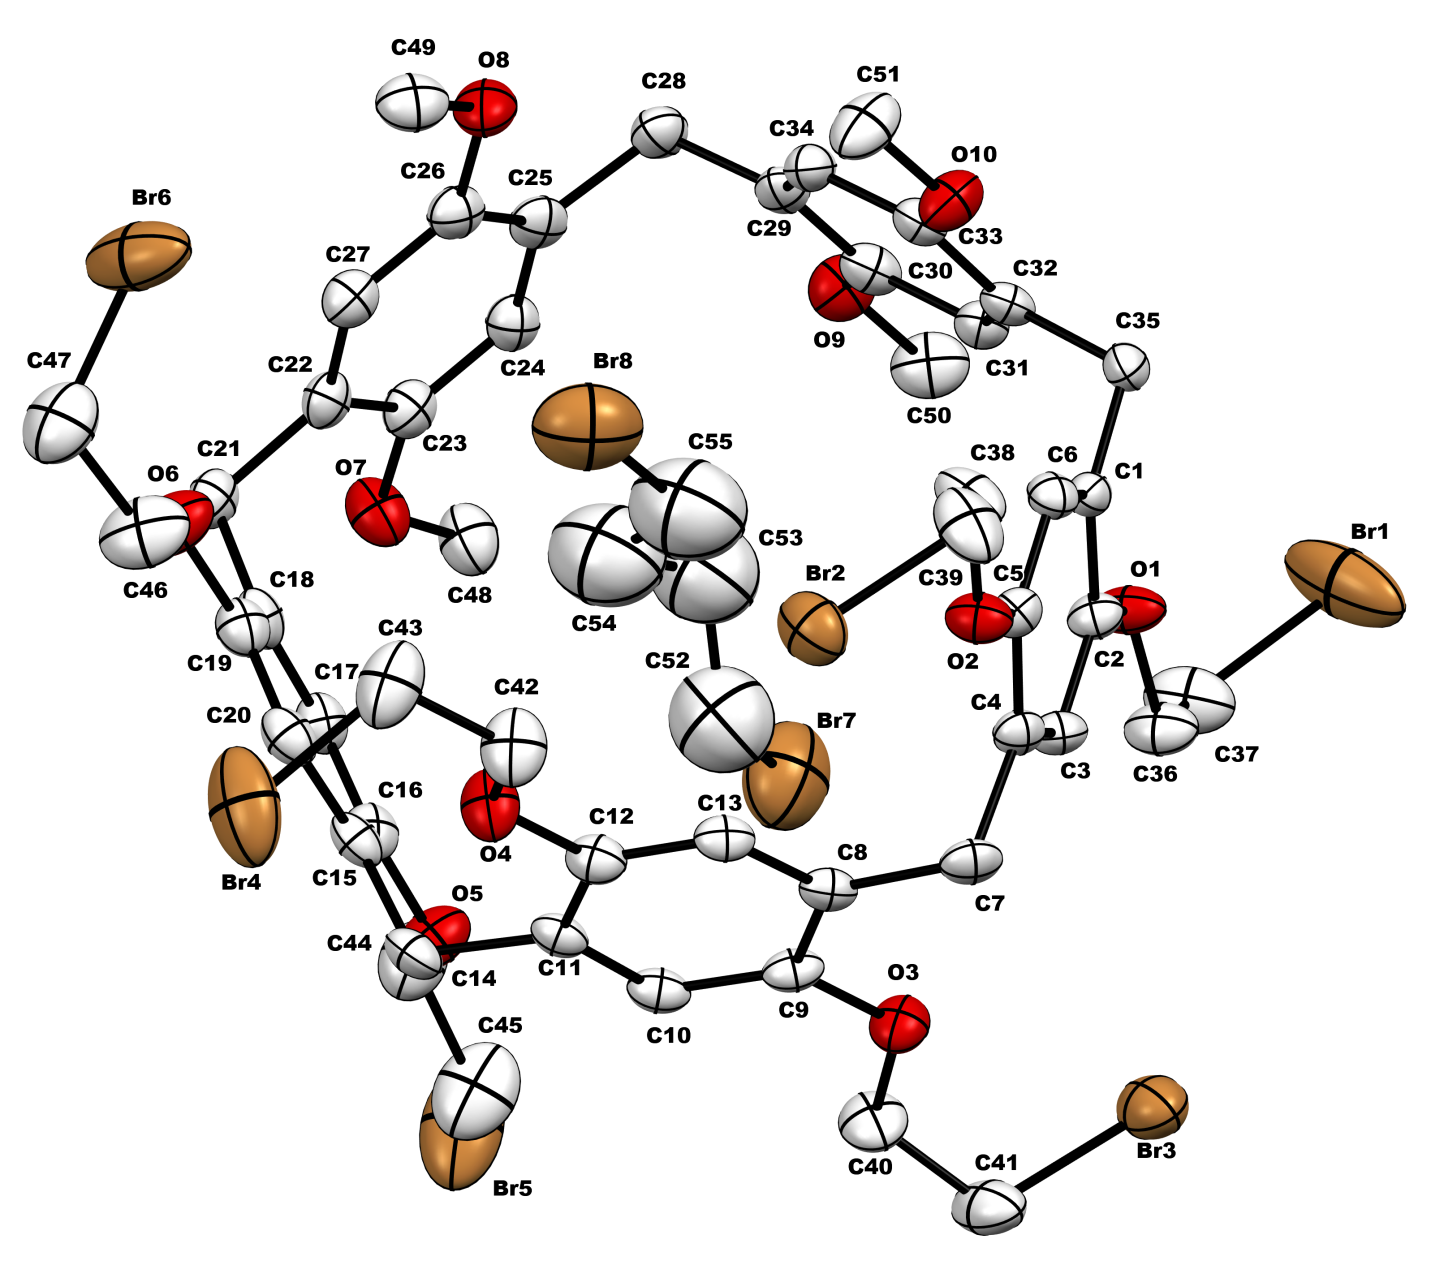


**Fig. S4.** Crystal structure of **PBr6.ButBr2** with displacement ellipsoids (30% probability). Hydrogen atoms are omitted for clarity.

**Table 3**: Non-bonding interactions between pillar[5]arene host and dibromobutane guest in the **PBr1_ButBr2**crystals ( Å, o).

| **A-B...C** | | **A-B** | | **B...C** | | **B....C** | | **A-B...C** | |
| --- | --- | --- | --- | --- | --- | --- | --- | --- | --- |
| C39-H39C…Br2A | 0.96 | | 3.133 | | 4.01(1) | | 152.1 | |
| C47A-H47A…O5 | 0.97 | | 3.011 | | 3.95(3) | | 162 | |
| C47A-H47B…O3 | 0.97 | | 2.946 | | 3.66(5) | | 131 | |
| C48A-H48A…O7 | 0.97 | | 3.208 | | 4.12(3) | | 159 | |
| C48A-H48B…O9 | 0.97 | | 3.325 | | 4.16(3) | | 145 | |
| C49A-H49A…π3 | 0.97 | | 2.879 | | 3.840 | | 170.09 | |
| C49A-H49B…π2 | 0.97 | | 3.013 | | 3.723 | | 130.88 | |
| C50A-H50A…π4 | 0.97 | | 2.890 | | 3.840 | | 167.03 | |
| C50A-H50B…π5 | 0.97 | | 2.850 | | 3.673 | | 143.10 | |
| C42-H42B…Br3A | 0.96 | | 3.227 | | 4.08(1) | | 148.4 | |

π2 - π5 are the centroid of the pillar[5]arene phenyl rings constitute C8-13,C15-C20, C22-C27 & C29-C34 respectively.

**Table 4**: Non-bonding interactions between pillar[5]arene host and dibromobutane guest in the **PBr2_ButBr2** crystals ( Å, o).

| **A-B...C** | | **A-B** | | **B...C** | | **B....C** | | **A-B...C** | |
| --- | --- | --- | --- | --- | --- | --- | --- | --- | --- |
| C23-H23B…Br2A | 0.959 | | 3.12 | | 3.97(1) | | 147.3 | |
| C25A-H25A…O5 | 0.97 | | 2.847 | | 3.68(2) | | 145 | |
| C25A-H25B…O3 | 0.97 | | 2.964 | | 3.86(2) | | 155 | |
| C26A-H26A…π2 | 0.97 | | 3.152 | | 3.841 | | 129.44 | |
| C26A-H26B…π3 | 0.97 | | 2.944 | | 3.875 | | 161.05 | |

π2 and π3 are the centroid of the pillar[5]arene phenyl rings constitute C5-10 & C12-C17 respectively.

**Table 5**: Non-bonding interactions between pillar[5]arene host and dibromobutane guest in the **PBr4_ButBr2** crystals ( Å, o).

| **A-B...C** | | **A-B** | | **B...C** | | **B....C** | | **A-B...C** | |
| --- | --- | --- | --- | --- | --- | --- | --- | --- | --- |
| C44-H44C…Br5 | 0.96 | | 3.048 | | 3.99(1) | | 166.4 | |
| C50-H50A …O9 | 0.97 | | 3.159 | | 4.00(2) | | 146 | |
| C50-H50B …π2 | 0.97 | | 3.313 | | 4.026 | | 148.84 | |
| C51-H51A …π4 | 0.97 | | 3.125 | | 3.826 | | 130.46 | |
| C51-H51B…π3 | 0.97 | | 3.009 | | 3.942 | | 161.89 | |
| C52-H52A…π5 | 0.97 | | 3.209 | | 3.954 | | 134.92 | |
| C52-H52B…π2 | 0.97 | | 3.098 | | 4.000 | | 155.47 | |
| C53-H53A…π4 | 0.97 | | 2.927 | | 3.633 | | 130.66 | |
| C53-H53B…π3 | 0.97 | | 3.101 | | 4.040 | | 162.26 | |
| C42-H42A…Br6 | 0.97 | | 3.218 | | 4.138(8) | | 158.9 | |

π2 - π5 are the centroid of the pillar[5]arene phenyl rings constitute C8-13,C15-C20, C22-C27 & C29-C34 respectively.

**Table 6**: Non-bonding interactions between pillar[5]arene host and dibromobutane guest in the **PBr6_ButBr2** crystals ( Å, o).

| **A-B...C** | | **A-B** | | **B...C** | | **B....C** | | **A-B...C** | |
| --- | --- | --- | --- | --- | --- | --- | --- | --- | --- |
| C36-H36A…Br7 | 0.97 | | 3.285 | | 3.98(1) | | 129.9 | |
| C52-H52A…O5 | 0.96 | | 2.727 | | 3.64(3) | | 149 | |
| C52-H52B …O3 | 0.97 | | 3.225 | | 4.03(3) | | 141 | |
| C53-H53A…π4 | 0.97 | | 3.265 | | 3.924 | | 126.94 | |
| C53-H53B…π5 | 0.97 | | 3.072 | | 3.796 | | 132.40 | |
| C54-H54A…π4 | 0.97 | | 2.854 | | 3.714 | | 148.19 | |
| C54-H54B…π3 | 0.97 | | 2.772 | | 3.503 | | 132.77 | |
| C55-H55A…O10 | 0.97 | | 3.205 | | 4.08(3) | | 151 | |
| C55-H55B…π1 | 0.97 | | 3.232 | | 3.842 | | 122.54 | |
| C49-H49C…Br8 | 0.96 | | 3.208 | | 4.12(1) | | 158.5 | |

π1 - π5 are the centroid of the pillar[5]arene phenyl rings constitute C1-6,C15-C20,C22-C27 & C29-C34 respectively.


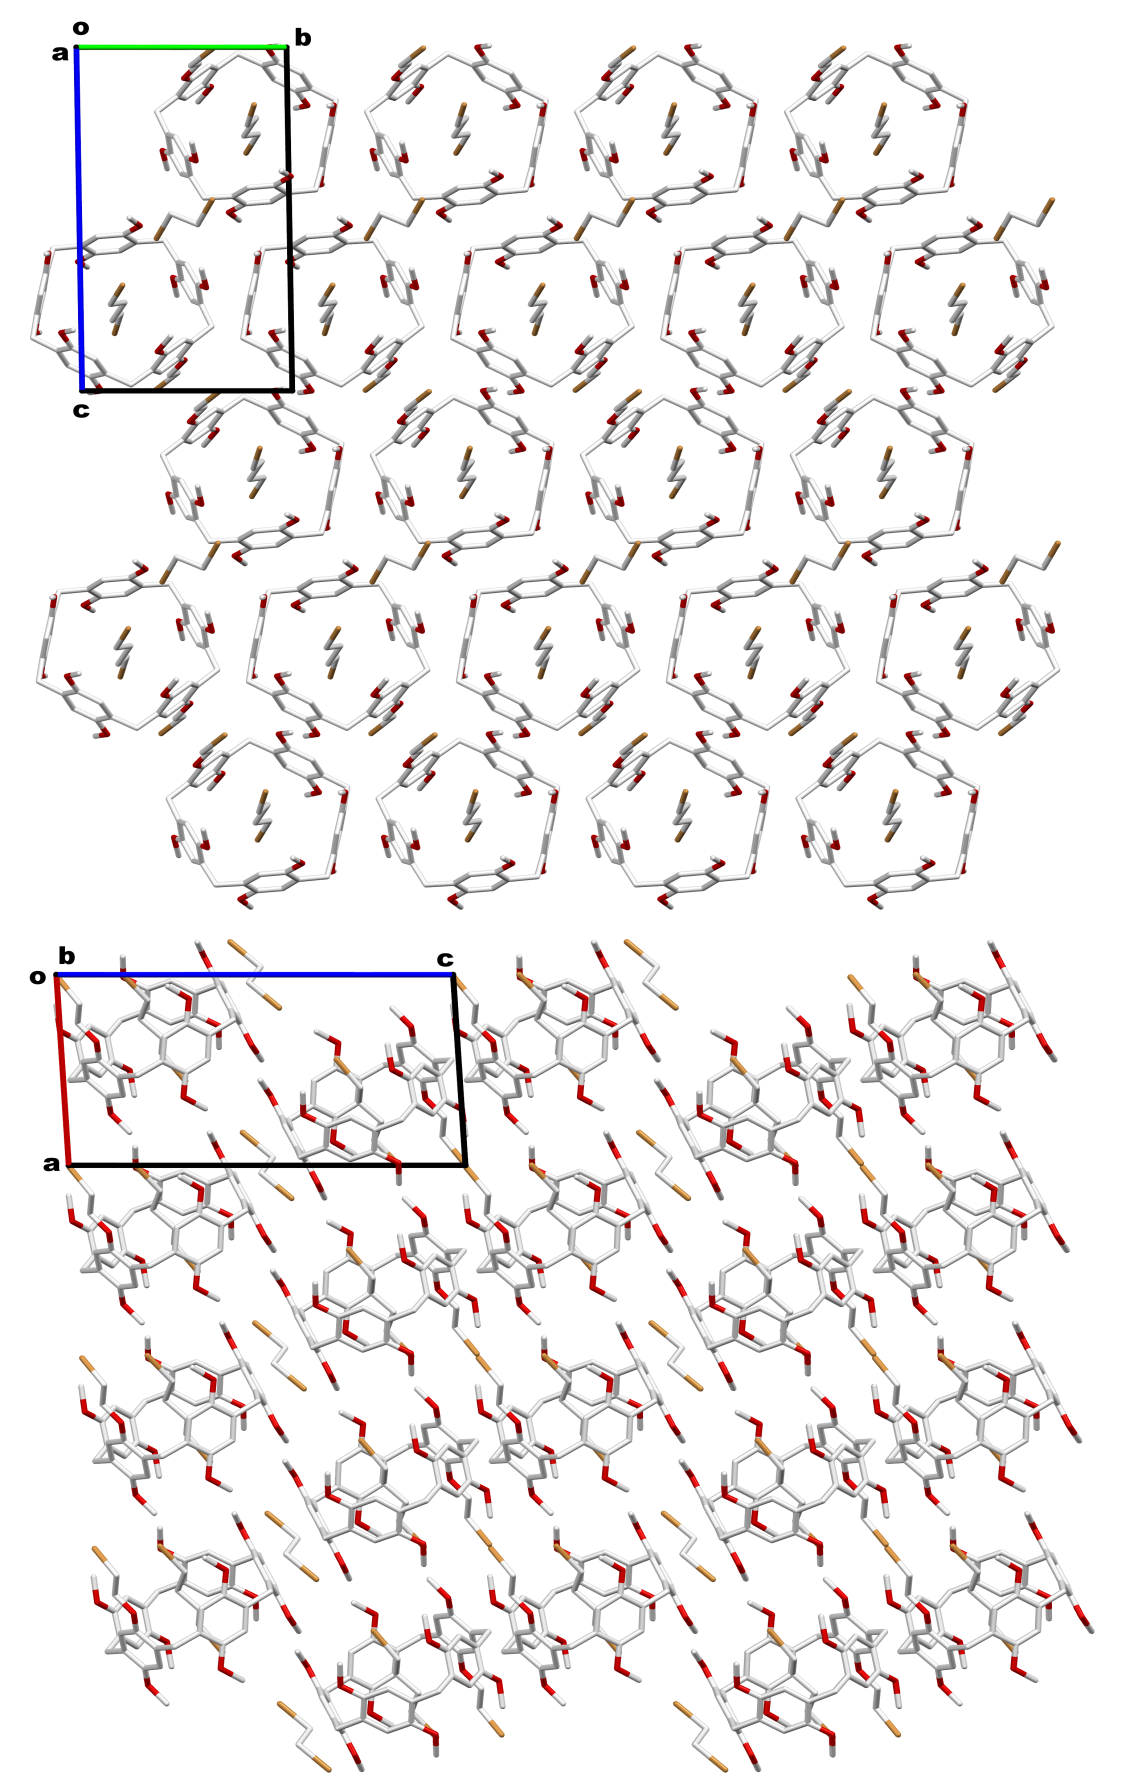


**Fig. S5.** Packing pattern of **PBr1.ButBr2** crystals viewed from two different orientations.


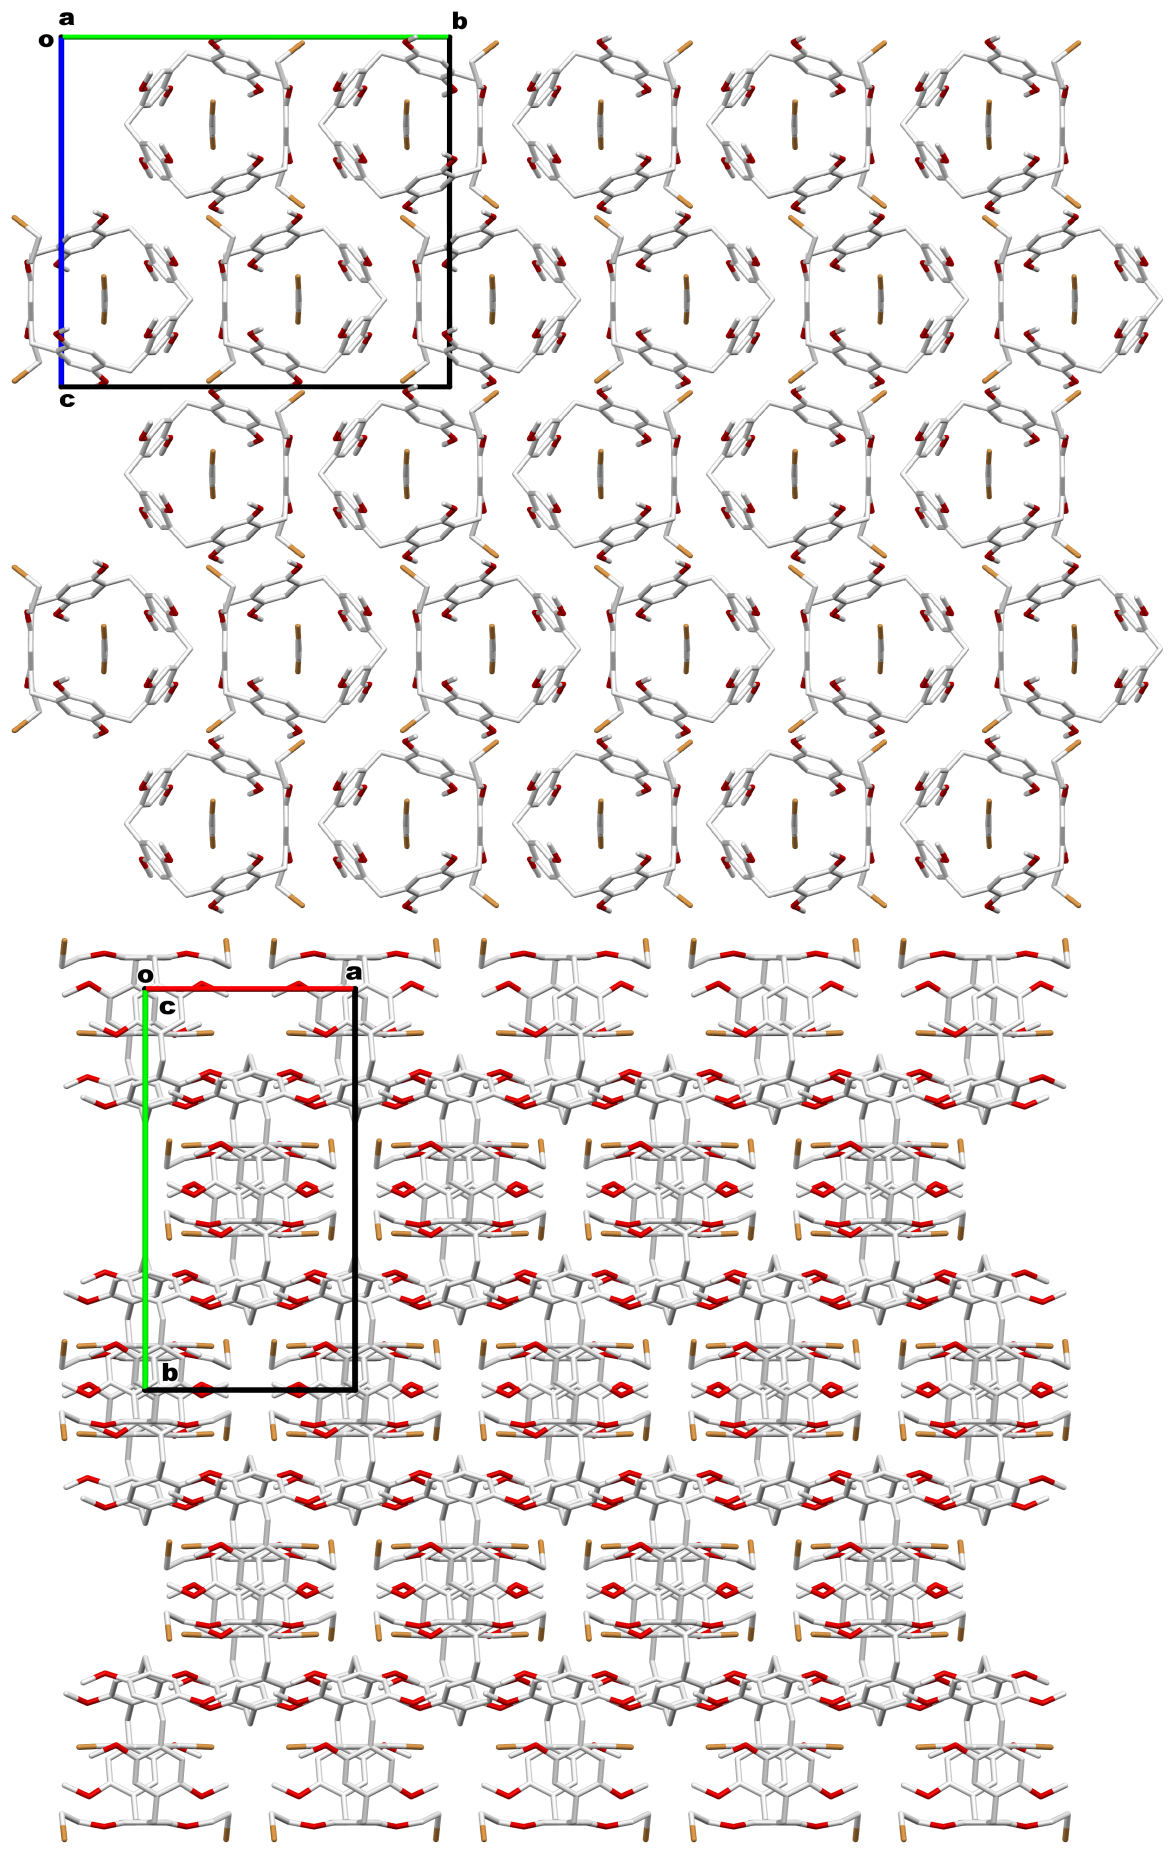


**Fig. S6.** Packing pattern of **PBr2.ButBr2** crystals viewed from two different orientations.


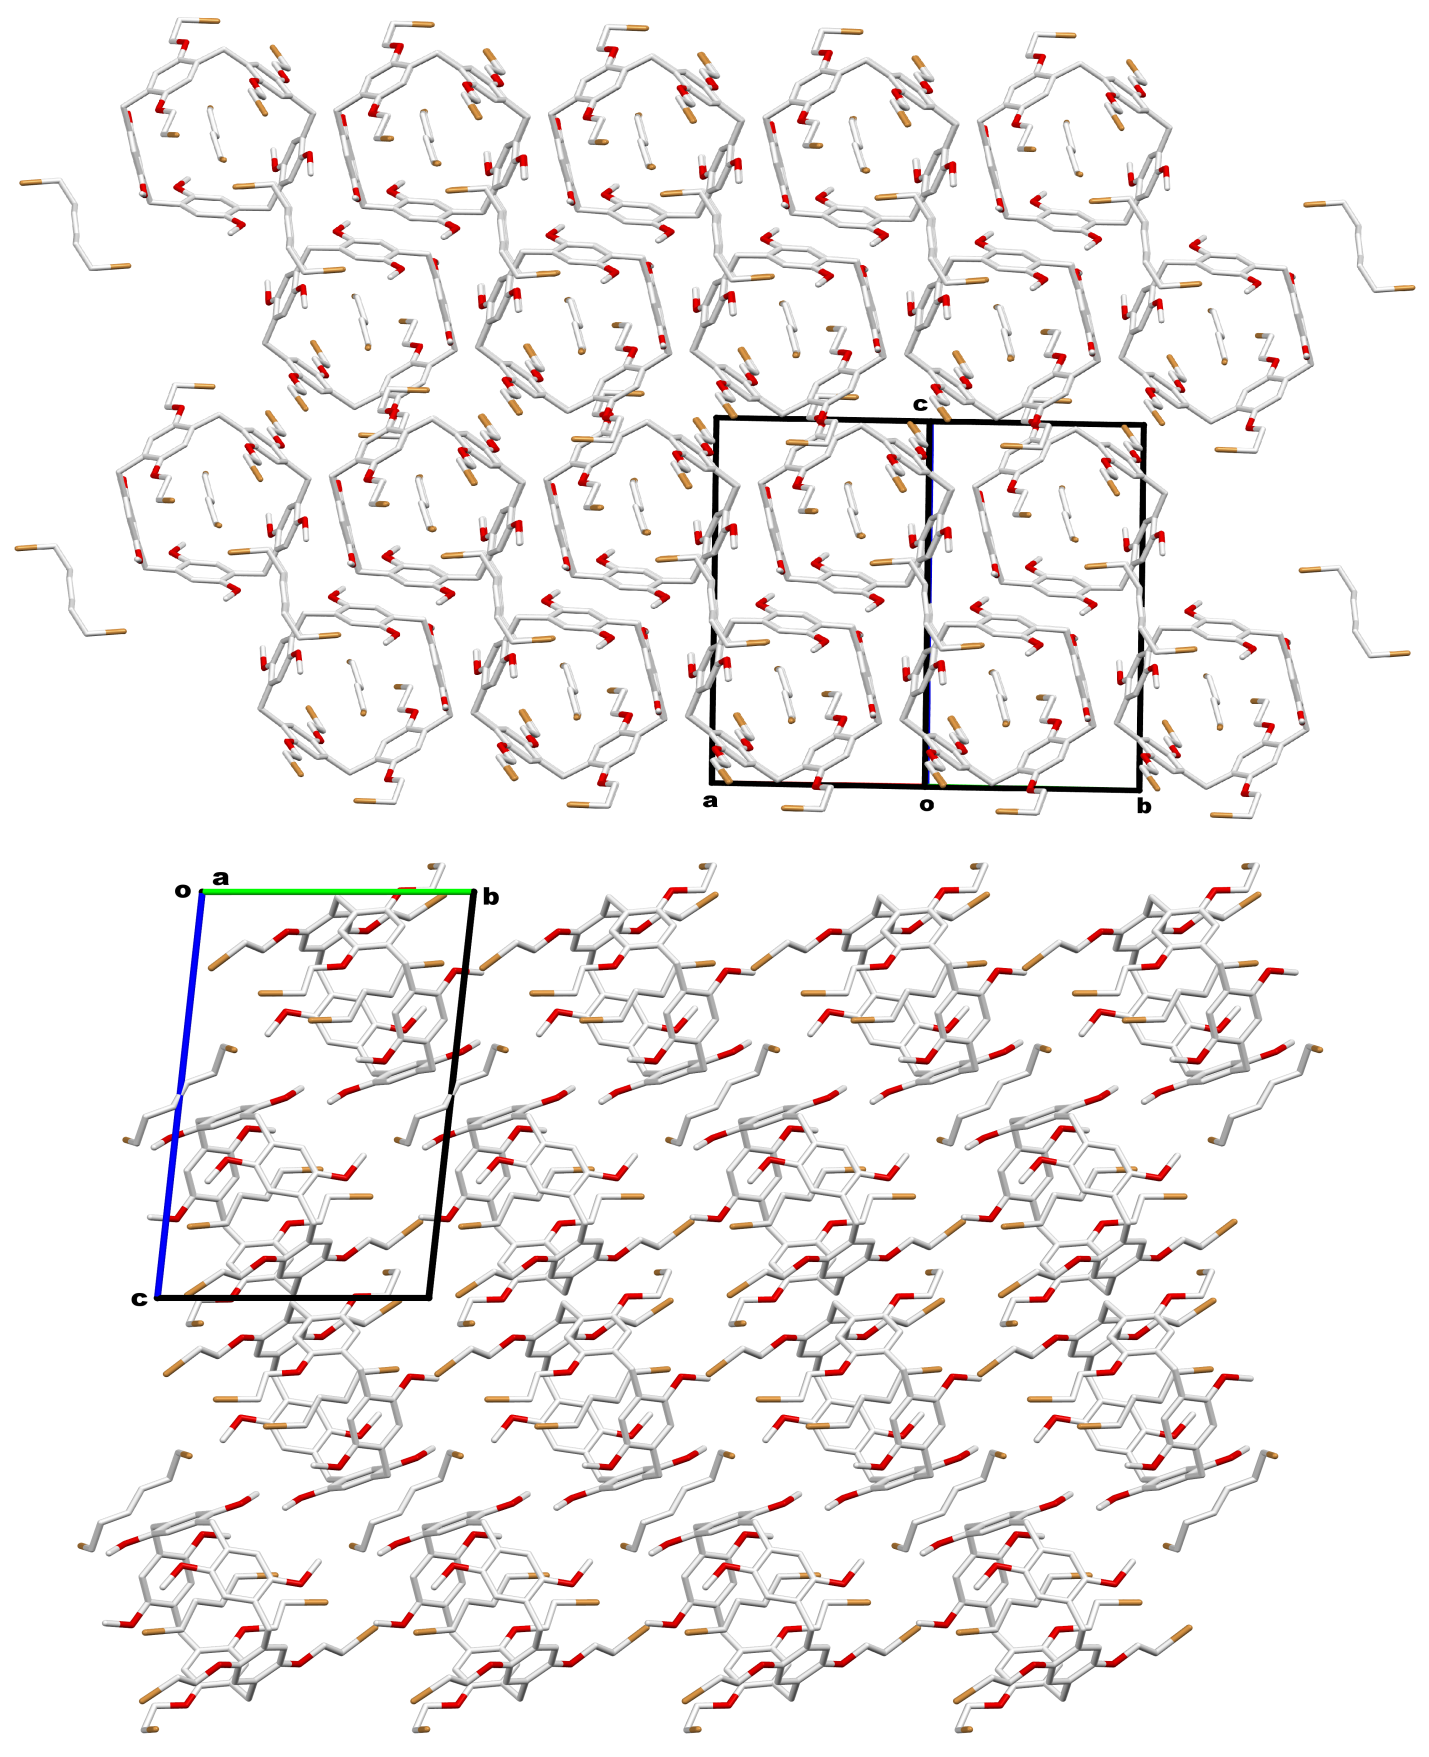


**Fig. S7.** Packing pattern of **PBr4.ButBr2** crystals viewed from two different orientations.


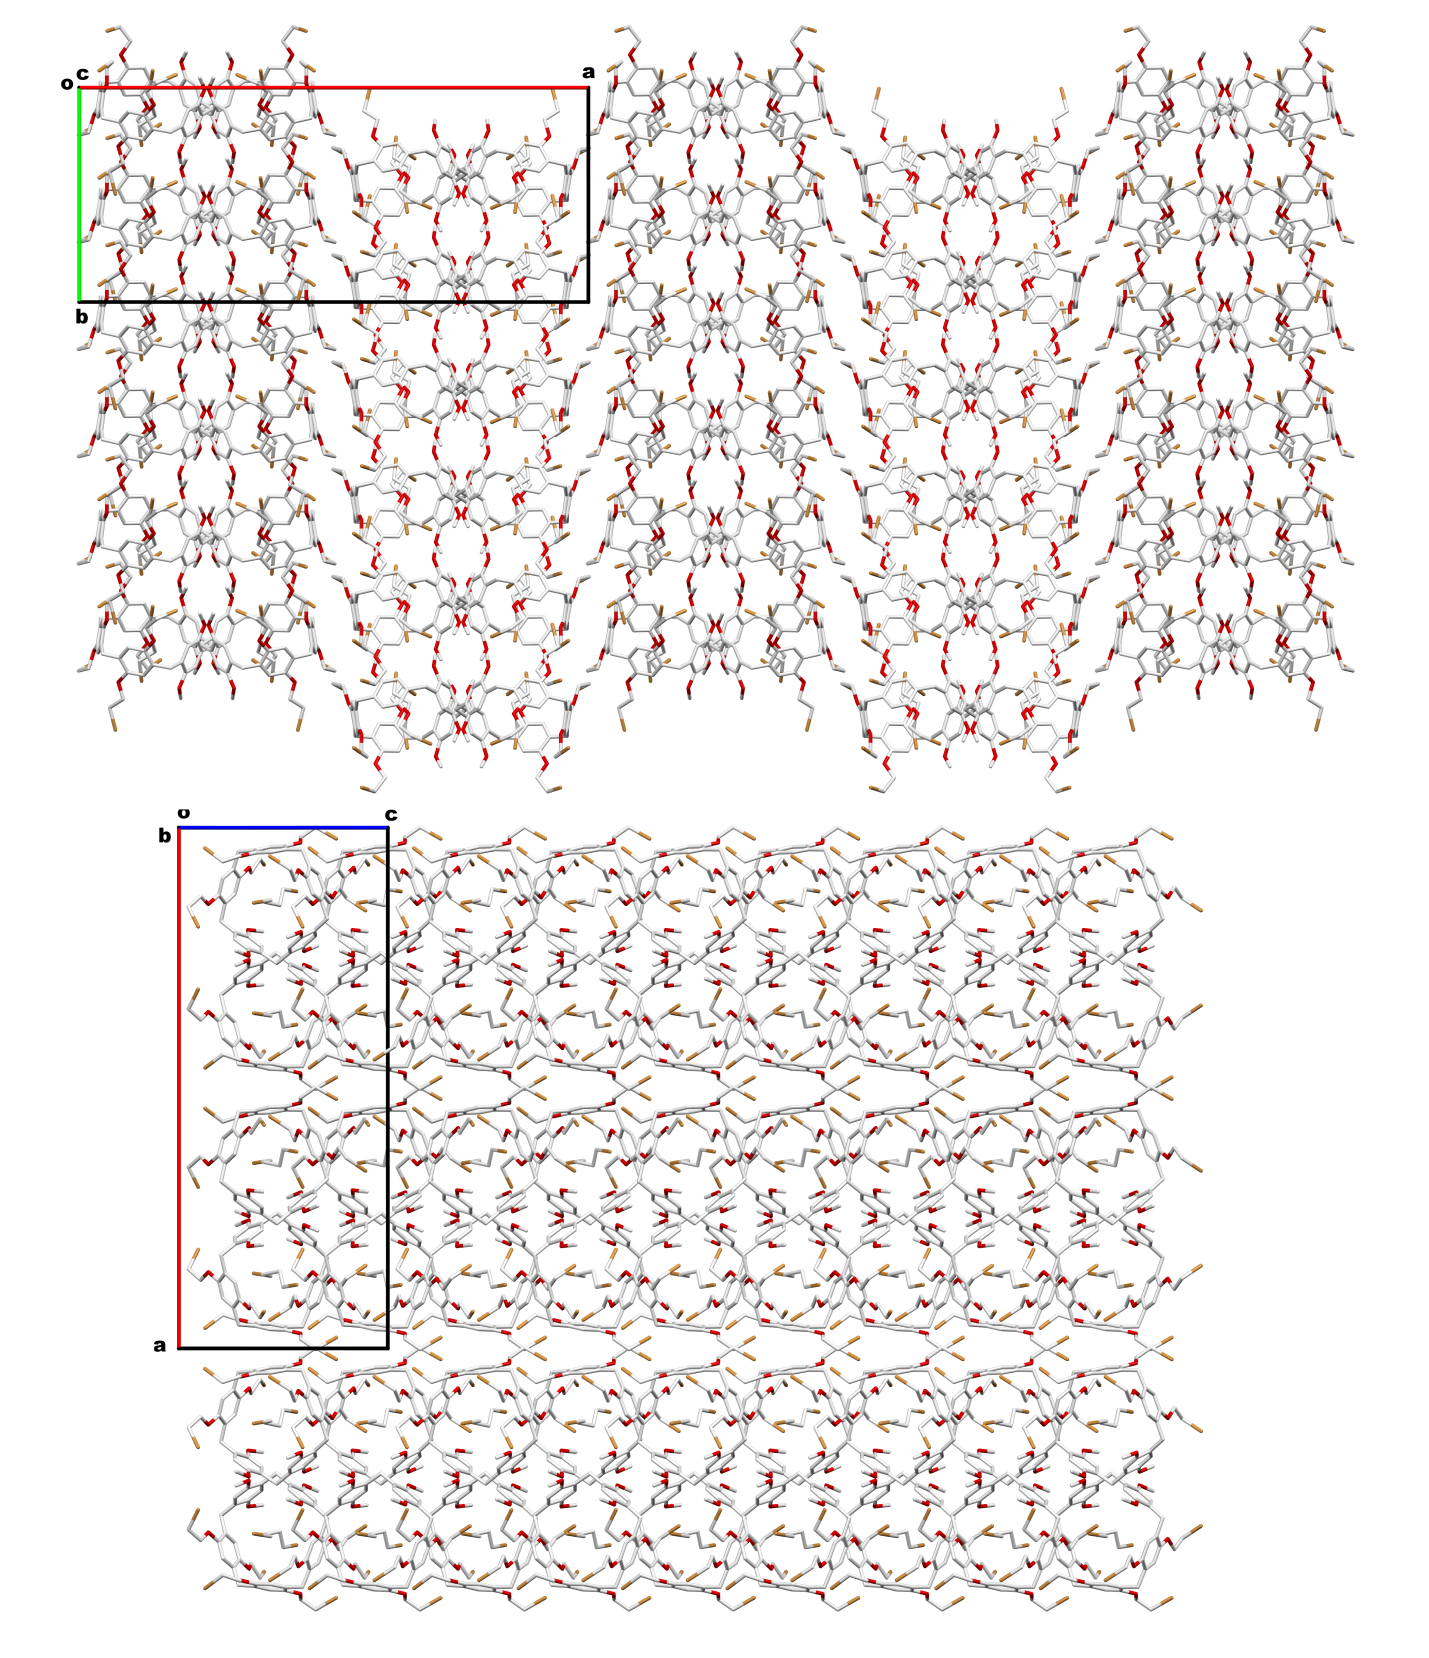


**Fig. S8.** Packing pattern of **PBr6.ButBr2** crystals viewed from two different orientations.

**CheckCIF_ PBr1.ButBr2**

# checkCIF (basic structural check) running

*Checking for embedded fcf data in CIF ...*
*Found embedded fcf data in CIF. Extracting fcf data from uploaded CIF, please wait***. . . .**

# checkCIF/PLATON (basic structural check)

Structure factors have been supplied for datablock(s) PBr1_ButBr2

THIS REPORT IS FOR GUIDANCE ONLY. IF USED AS PART OF A REVIEW PROCEDURE FOR PUBLICATION, IT SHOULD NOT REPLACE THE EXPERTISE OF AN EXPERIENCED CRYSTALLOGRAPHIC REFEREE.

No syntax errors found. [CIF dictionary](https://www.iucr.org/iucr-top/cif/cif_core/definitions/index.html)
Please wait while processing .... [Interpreting this report](https://journals.iucr.org/services/cif/checking/checkcifreport.html)

[Structure factor report](https://checkcif.iucr.org/A535DN3qhAD2E/060625074744721297694/ckf.html)

**Datablock: PBr1_ButBr2**

| Bond precision: | C-C = 0.0115 A | Wavelength=0.71075 |
| --- | --- | --- |

| Cell: | a=11.9504(6) | b=12.3790(5) | c=19.820(1) |
| --- | --- | --- | --- |
|  | alpha=87.229(6) | beta=85.730(6) | gamma=61.925(4) |
| Temperature: | 293 K |  |  |

|  | Calculated | Reported |
| --- | --- | --- |
| Volume | 2579.6(2) | 2579.6(2) |
| Space group | P -1 | P -1 |
| Hall group | -P 1 | -P 1 |
| Moiety formula | C46 H51 Br O10, C4 H8 Br2, 0.5(C2 H4 Br2) | ? |
| Sum formula | C51 H61 Br4 O10 | C51 H61 Br4 O10 |
| Mr | 1153.60 | 1153.63 |
| Dx,g cm-3 | 1.485 | 1.485 |
| Z | 2 | 2 |
| Mu (mm-1) | 3.175 | 3.175 |
| F000 | 1174.0 | 1174.0 |
| F000' | 1172.24 |  |
| h,k,lmax | 14,14,23 | 14,14,23 |
| Nref | 9119 | 9065 |
| Tmin,Tmax | 0.639,0.776 | 0.464,0.789 |
| Tmin' | 0.615 |  |

| Correction method= # Reported T Limits: Tmin=0.464 Tmax=0.789 AbsCorr = MULTI-SCAN |  |
| --- | --- |

| Data completeness= 0.994 | Theta(max)= 25.026 |
| --- | --- |

| R(reflections)= 0.0961( 4185) | wR2(reflections)= 0.3330( 9065) |
| --- | --- |
| | S = 1.016 | Npar= 649 | | --- | --- | |  |

The following ALERTS were generated. Each ALERT has the format

**test-name_ALERT_alert-type_alert-level**.

Click on the hyperlinks for more details of the test.


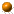
**Alert level B**

[PLAT910_ALERT_3_B](javascript:makeHelpWindow(%22PLAT910.html%22)) Missing # of FCF Reflection(s) Below Theta(Min). 17 Note

1 0 0, 0 1 0, 1 1 0, -1 -1 1, 0 -1 1, -1 0 1,

0 0 1, 1 0 1, 0 1 1, 1 1 1, -1 -1 2, 0 -1 2,

-1 0 2, 0 0 2, 1 0 2, 0 1 2, 1 1 2,

**RESPONSE:** The unit cell is reasonable large and these low angle reflections are probably missing due to the beamstop. This occurs rather frequently with our goniometer's geometry, especially for larger unit cells.


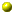
**Alert level C**

[PLAT026_ALERT_3_C](javascript:makeHelpWindow(%22PLAT026.html%22)) Ratio Observed / Unique Reflections (too) Low .. 46% Check

[PLAT084_ALERT_3_C](javascript:makeHelpWindow(%22PLAT084.html%22)) High wR2 Value (i.e. > 0.25) ................... 0.33 Report

[PLAT234_ALERT_4_C](javascript:makeHelpWindow(%22PLAT234.html%22)) Large Hirshfeld Difference O5 --C41 . 0.19 Ang.

**And 4 other PLAT234 Alerts**

More ...

[PLAT260_ALERT_2_C](javascript:makeHelpWindow(%22PLAT260.html%22)) Large Average Ueq of Residue Including Br2A 0.175 Check

**And 2 other PLAT260 Alerts**

More ...

[PLAT341_ALERT_3_C](javascript:makeHelpWindow(%22PLAT341.html%22)) Low Bond Precision on C-C Bonds ............... 0.01145 Ang.

[PLAT906_ALERT_3_C](javascript:makeHelpWindow(%22PLAT906.html%22)) Large K Value in the Analysis of Variance ...... 17.262 Check

**And 2 other PLAT906 Alerts**

More ...

[PLAT911_ALERT_3_C](javascript:makeHelpWindow(%22PLAT911.html%22)) Missing FCF Refl Between Thmin & STh/L= 0.595 37 Report

-1 3 0, 3 4 0, 4 5 0, -10-14 1, -3 -2 2, -4-14 3,

-2 -5 3, 6 5 3, 14 9 3, -9-14 4, -6-14 4, -5-14 4,

-4-14 4, -11-13 4, 0 0 4, 10 14 4, -7-14 5, -6-14 5,

-5-14 5, -4-14 5, -7-14 6, -6-14 6, -7-13 7, -8-13 8,

-7-13 8, -1 0 8, -8-13 9, -7-13 9, -6-13 10, -5-13 10,

4 -9 11, 8 12 14, 9 -2 15, -4 -7 20, 1 -4 22, -2 0 23,

4 3 23,


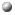
**Alert level G**

[PLAT002_ALERT_2_G](javascript:makeHelpWindow(%22PLAT002.html%22)) Number of Distance or Angle Restraints on AtSite 12 Note

[PLAT003_ALERT_2_G](javascript:makeHelpWindow(%22PLAT003.html%22)) Number of Uiso or U(i,j) Restrained non-H-Atoms 12 Report

[PLAT172_ALERT_4_G](javascript:makeHelpWindow(%22PLAT172.html%22)) The CIF-Embedded .res File Contains DFIX Records 3 Report

[PLAT173_ALERT_4_G](javascript:makeHelpWindow(%22PLAT173.html%22)) The CIF-Embedded .res File Contains DANG Records 2 Report

[PLAT177_ALERT_4_G](javascript:makeHelpWindow(%22PLAT177.html%22)) The CIF-Embedded .res File Contains DELU Records 1 Report

[PLAT178_ALERT_4_G](javascript:makeHelpWindow(%22PLAT178.html%22)) The CIF-Embedded .res File Contains SIMU Records 1 Report

[PLAT199_ALERT_1_G](javascript:makeHelpWindow(%22PLAT199.html%22)) Reported _cell_measurement_temperature ..... (K) 293 Check

[PLAT200_ALERT_1_G](javascript:makeHelpWindow(%22PLAT200.html%22)) Reported _diffrn_ambient_temperature ..... (K) 293 Check

[PLAT302_ALERT_4_G](javascript:makeHelpWindow(%22PLAT302.html%22)) Anion/Solvent/Minor-Residue Disorder (Resd 2) 100% Note

[PLAT302_ALERT_4_G](javascript:makeHelpWindow(%22PLAT302.html%22)) Anion/Solvent/Minor-Residue Disorder (Resd 3) 100% Note

[PLAT304_ALERT_4_G](javascript:makeHelpWindow(%22PLAT304.html%22)) Non-Integer Number of Atoms in ..... (Resd 2) 7.50 Check

[PLAT304_ALERT_4_G](javascript:makeHelpWindow(%22PLAT304.html%22)) Non-Integer Number of Atoms in ..... (Resd 3) 6.50 Check

[PLAT434_ALERT_2_G](javascript:makeHelpWindow(%22PLAT434.html%22)) Short Inter HL..HL Contact Br4 ..Br3B . 3.40 Ang.

-1+x,y,z = 1_455 Check

[PLAT860_ALERT_3_G](javascript:makeHelpWindow(%22PLAT860.html%22)) Number of Least-Squares Restraints ............. 174 Note

[PLAT883_ALERT_1_G](javascript:makeHelpWindow(%22PLAT883.html%22)) Absent Datum for _atom_sites_solution_primary .. Please Do !

[PLAT933_ALERT_2_G](javascript:makeHelpWindow(%22PLAT933.html%22)) Number of HKL-OMIT Records in Embedded .res File 6 Note

0 0 4, -2 -5 3, -1 3 0, -3 -2 2, 6 5 3, -1 0 8,

[PLAT941_ALERT_3_G](javascript:makeHelpWindow(%22PLAT941.html%22)) Average HKL Measurement Multiplicity ........... 3.4 Low

[PLAT969_ALERT_5_G](javascript:makeHelpWindow(%22PLAT969.html%22)) The 'Henn et al.' R-Factor-gap value ........... 7.475 Note

Predicted wR2: Based on SigI**2 4.46 or SHELX Weight 32.78

[PLAT978_ALERT_2_G](javascript:makeHelpWindow(%22PLAT978.html%22)) Number C-C Bonds with Positive Residual Density. 6 Info

0 **ALERT level A** = Most likely a serious problem - resolve or explain

1 **ALERT level B** = A potentially serious problem, consider carefully

15 **ALERT level C** = Check. Ensure it is not caused by an omission or oversight

19 **ALERT level G** = General information/check it is not something unexpected

3 ALERT type 1 CIF construction/syntax error, inconsistent or missing data

8 ALERT type 2 Indicator that the structure model may be wrong or deficient

10 ALERT type 3 Indicator that the structure quality may be low

13 ALERT type 4 Improvement, methodology, query or suggestion

1 ALERT type 5 Informative message, check

|  |
| --- |

**PLATON version of 02/02/2025; check.def file version of 02/02/2025**

| **Datablock PBr1_ButBr2** - ellipsoid plot |
| --- |
| 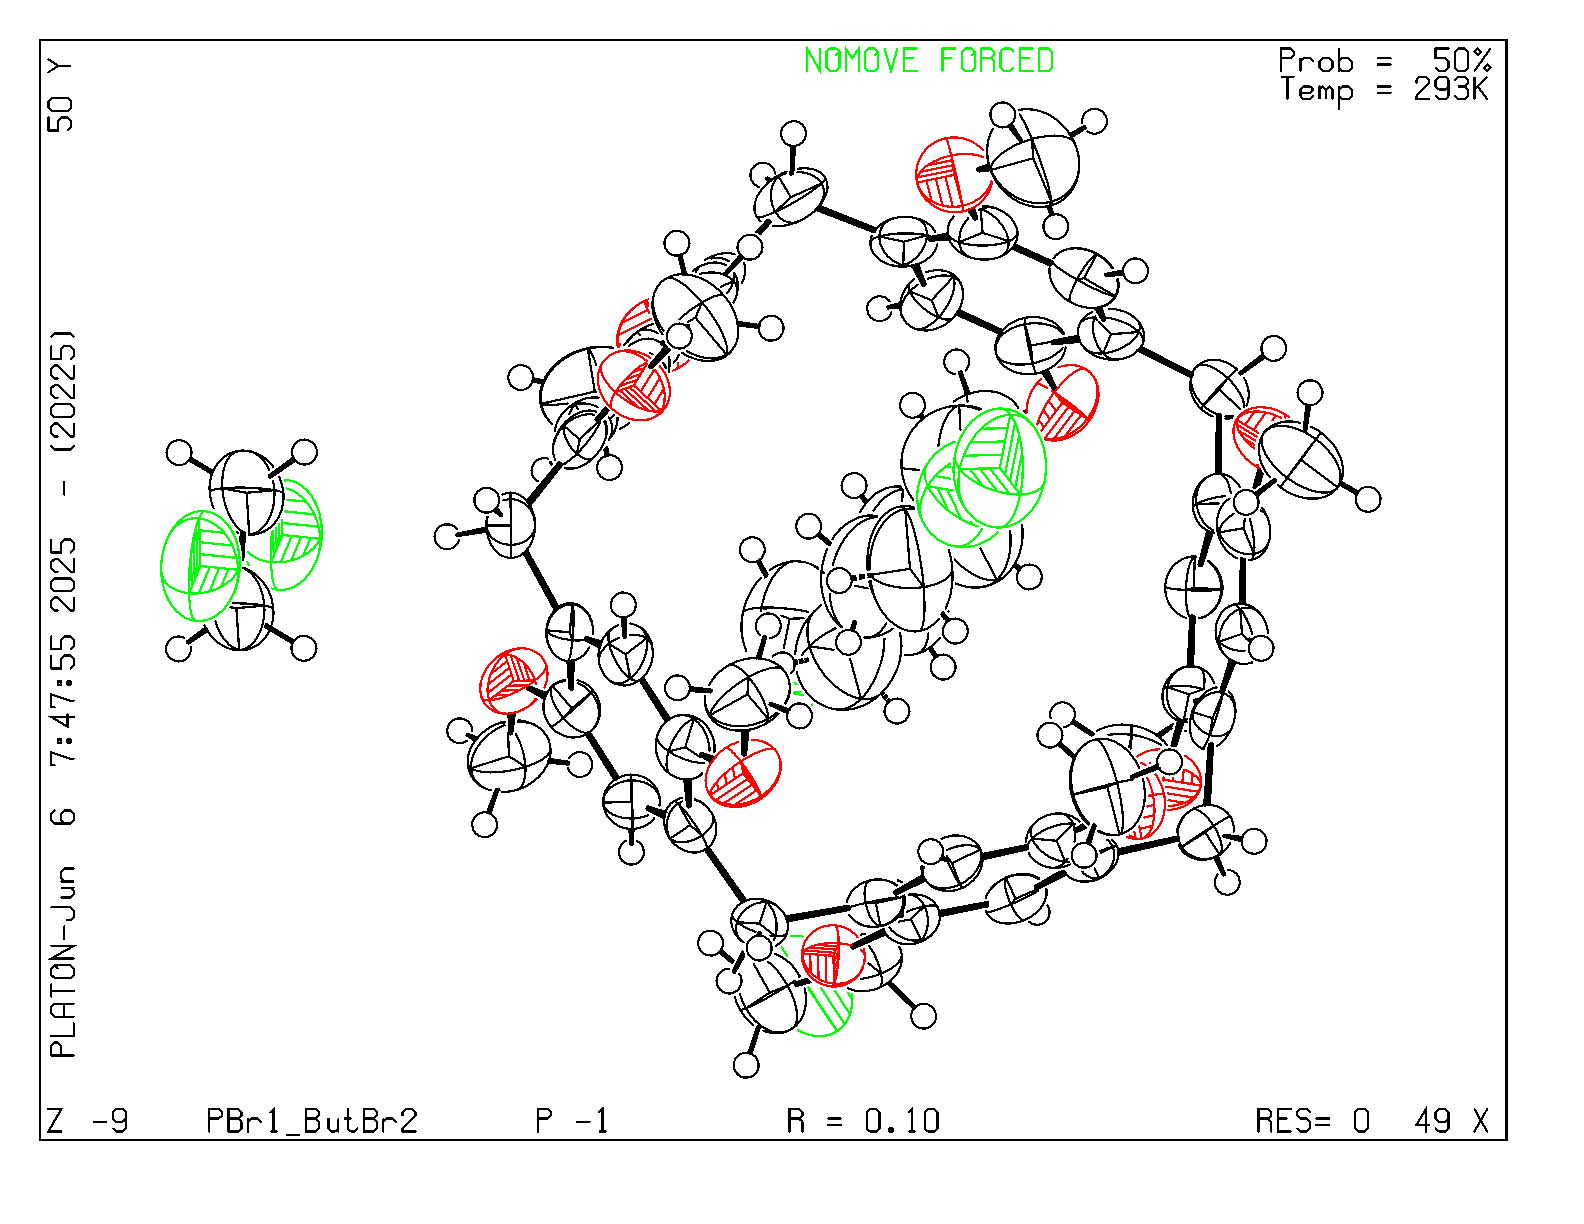 |

**CheckCIF_ PBr2.ButBr2**

# checkCIF (basic structural check) running

*Checking for embedded fcf data in CIF ...*
*Found embedded fcf data in CIF. Extracting fcf data from uploaded CIF, please wait***. . .**

# checkCIF/PLATON (basic structural check)

Structure factors have been supplied for datablock(s) PBr2_ButBr2

THIS REPORT IS FOR GUIDANCE ONLY. IF USED AS PART OF A REVIEW PROCEDURE FOR PUBLICATION, IT SHOULD NOT REPLACE THE EXPERTISE OF AN EXPERIENCED CRYSTALLOGRAPHIC REFEREE.

No syntax errors found. [CIF dictionary](https://www.iucr.org/iucr-top/cif/cif_core/definitions/index.html)
Please wait while processing .... [Interpreting this report](https://journals.iucr.org/services/cif/checking/checkcifreport.html)

[Structure factor report](https://checkcif.iucr.org/L7hqph46xZC3b/060625075232189380918/ckf.html)

**Datablock: PBr2_ButBr2**

| Bond precision: | C-C = 0.0091 A | Wavelength=0.71075 |
| --- | --- | --- |

| Cell: | a=11.147(6) | b=21.854(14) | c=21.609(13) |
| --- | --- | --- | --- |
|  | alpha=90 | beta=104.819(9) | gamma=90 |
| Temperature: | 293 K |  |  |

|  | Calculated | Reported |
| --- | --- | --- |
| Volume | 5089(5) | 5089(5) |
| Space group | C 2/c | C 2/c |
| Hall group | -C 2yc | -C 2yc |
| Moiety formula | C47 H52 Br2 O10, C4 H8 Br2 | ? |
| Sum formula | C51 H60 Br4 O10 | C51 H60 Br4 O10 |
| Mr | 1152.59 | 1152.63 |
| Dx,g cm-3 | 1.504 | 1.504 |
| Z | 4 | 4 |
| Mu (mm-1) | 3.219 | 3.219 |
| F000 | 2344.0 | 2344.0 |
| F000' | 2340.49 |  |
| h,k,lmax | 13,26,25 | 13,26,25 |
| Nref | 4500 | 4465 |
| Tmin,Tmax | 0.531,0.702 | 0.444,0.749 |
| Tmin' | 0.520 |  |

| Correction method= # Reported T Limits: Tmin=0.444 Tmax=0.749 AbsCorr = MULTI-SCAN |  |
| --- | --- |

| Data completeness= 0.992 | Theta(max)= 25.028 |
| --- | --- |

| R(reflections)= 0.0772( 1888) | wR2(reflections)= 0.3031( 4465) |
| --- | --- |
| | S = 0.927 | Npar= 372 | | --- | --- | |  |

The following ALERTS were generated. Each ALERT has the format

**test-name_ALERT_alert-type_alert-level**.

Click on the hyperlinks for more details of the test.


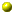
**Alert level C**

[PLAT026_ALERT_3_C](javascript:makeHelpWindow(%22PLAT026.html%22)) Ratio Observed / Unique Reflections (too) Low .. 42% Check

[PLAT084_ALERT_3_C](javascript:makeHelpWindow(%22PLAT084.html%22)) High wR2 Value (i.e. > 0.25) ................... 0.30 Report

[PLAT242_ALERT_2_C](javascript:makeHelpWindow(%22PLAT242.html%22)) Low 'MainMol' Ueq as Compared to Neighbors of O5 Check

[PLAT260_ALERT_2_C](javascript:makeHelpWindow(%22PLAT260.html%22)) Large Average Ueq of Residue Including Br2A 0.182 Check

[PLAT260_ALERT_2_C](javascript:makeHelpWindow(%22PLAT260.html%22)) Large Average Ueq of Residue Including Br2B 0.181 Check

[PLAT334_ALERT_2_C](javascript:makeHelpWindow(%22PLAT334.html%22)) Small <C-C> Benzene Dist. C1 -C3_a . 1.37 Ang.

[PLAT341_ALERT_3_C](javascript:makeHelpWindow(%22PLAT341.html%22)) Low Bond Precision on C-C Bonds ............... 0.0091 Ang.

[PLAT906_ALERT_3_C](javascript:makeHelpWindow(%22PLAT906.html%22)) Large K Value in the Analysis of Variance ...... 10.974 Check

[PLAT906_ALERT_3_C](javascript:makeHelpWindow(%22PLAT906.html%22)) Large K Value in the Analysis of Variance ...... 2.615 Check

[PLAT910_ALERT_3_C](javascript:makeHelpWindow(%22PLAT910.html%22)) Missing # of FCF Reflection(s) Below Theta(Min). 8 Note

1 1 0, 0 2 0, -1 1 1, 1 1 1, 0 2 1, 0 0 2,

-1 1 2, 0 2 2,

[PLAT911_ALERT_3_C](javascript:makeHelpWindow(%22PLAT911.html%22)) Missing FCF Refl Between Thmin & STh/L= 0.595 27 Report

12 0 2, 12 2 3, 12 0 4, 12 2 4, 11 1 5, -12 0 6,

11 1 6, 11 3 6, 11 1 7, 11 3 7, 8 6 7, 10 0 8,

11 1 8, 11 3 8, 10 2 9, 10 0 10, 10 2 10, 7 3 10,

10 4 10, 9 1 11, 10 2 11, 9 5 11, 9 1 12, 9 1 13,

9 3 13, 8 0 14, 8 2 15,

[PLAT918_ALERT_3_C](javascript:makeHelpWindow(%22PLAT918.html%22)) Reflection(s) with I(obs) much Smaller I(calc) . 1 Check


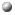
**Alert level G**

[PLAT002_ALERT_2_G](javascript:makeHelpWindow(%22PLAT002.html%22)) Number of Distance or Angle Restraints on AtSite 17 Note

[PLAT003_ALERT_2_G](javascript:makeHelpWindow(%22PLAT003.html%22)) Number of Uiso or U(i,j) Restrained non-H-Atoms 17 Report

[PLAT172_ALERT_4_G](javascript:makeHelpWindow(%22PLAT172.html%22)) The CIF-Embedded .res File Contains DFIX Records 2 Report

[PLAT173_ALERT_4_G](javascript:makeHelpWindow(%22PLAT173.html%22)) The CIF-Embedded .res File Contains DANG Records 1 Report

[PLAT175_ALERT_4_G](javascript:makeHelpWindow(%22PLAT175.html%22)) The CIF-Embedded .res File Contains SAME Records 2 Report

[PLAT176_ALERT_4_G](javascript:makeHelpWindow(%22PLAT176.html%22)) The CIF-Embedded .res File Contains SADI Records 6 Report

[PLAT177_ALERT_4_G](javascript:makeHelpWindow(%22PLAT177.html%22)) The CIF-Embedded .res File Contains DELU Records 3 Report

[PLAT178_ALERT_4_G](javascript:makeHelpWindow(%22PLAT178.html%22)) The CIF-Embedded .res File Contains SIMU Records 3 Report

[PLAT188_ALERT_3_G](javascript:makeHelpWindow(%22PLAT188.html%22)) A Non-default SIMU Restraint Value has been used 0.0200 Report

[PLAT199_ALERT_1_G](javascript:makeHelpWindow(%22PLAT199.html%22)) Reported _cell_measurement_temperature ..... (K) 293 Check

[PLAT200_ALERT_1_G](javascript:makeHelpWindow(%22PLAT200.html%22)) Reported _diffrn_ambient_temperature ..... (K) 293 Check

[PLAT299_ALERT_4_G](javascript:makeHelpWindow(%22PLAT299.html%22)) Atom Site Occupancy Constrained at ............. 0.5 Check

H18A H18B

[PLAT301_ALERT_3_G](javascript:makeHelpWindow(%22PLAT301.html%22)) Main Residue Disorder ..............(Resd 1) 17% Note

[PLAT302_ALERT_4_G](javascript:makeHelpWindow(%22PLAT302.html%22)) Anion/Solvent/Minor-Residue Disorder (Resd 2) 100% Note

[PLAT302_ALERT_4_G](javascript:makeHelpWindow(%22PLAT302.html%22)) Anion/Solvent/Minor-Residue Disorder (Resd 3) 100% Note

[PLAT304_ALERT_4_G](javascript:makeHelpWindow(%22PLAT304.html%22)) Non-Integer Number of Atoms in ..... (Resd 2) 7.56 Check

[PLAT304_ALERT_4_G](javascript:makeHelpWindow(%22PLAT304.html%22)) Non-Integer Number of Atoms in ..... (Resd 3) 6.44 Check

[PLAT367_ALERT_2_G](javascript:makeHelpWindow(%22PLAT367.html%22)) Long? C(sp?)-C(sp?) Bond C15 - C18 . 1.51 Ang.

[PLAT410_ALERT_2_G](javascript:makeHelpWindow(%22PLAT410.html%22)) Short Intra H...H Contact H3 ..H19D . 1.78 Ang.

1-x,y,3/2-z = 2_656 Check

[PLAT721_ALERT_1_G](javascript:makeHelpWindow(%22PLAT721.html%22)) Bond Calc 0.97000, Rep 0.96000 Dev... 0.01 Ang.

C24A -H24C 1_555 1_555 ........ # 38 Check

[PLAT860_ALERT_3_G](javascript:makeHelpWindow(%22PLAT860.html%22)) Number of Least-Squares Restraints ............. 205 Note

[PLAT883_ALERT_1_G](javascript:makeHelpWindow(%22PLAT883.html%22)) Absent Datum for _atom_sites_solution_primary .. Please Do !

[PLAT941_ALERT_3_G](javascript:makeHelpWindow(%22PLAT941.html%22)) Average HKL Measurement Multiplicity ........... 3.3 Low

[PLAT969_ALERT_5_G](javascript:makeHelpWindow(%22PLAT969.html%22)) The 'Henn et al.' R-Factor-gap value ........... 3.188 Note

Predicted wR2: Based on SigI**2 9.51 or SHELX Weight 32.69

[PLAT978_ALERT_2_G](javascript:makeHelpWindow(%22PLAT978.html%22)) Number C-C Bonds with Positive Residual Density. 2 Info

0 **ALERT level A** = Most likely a serious problem - resolve or explain

0 **ALERT level B** = A potentially serious problem, consider carefully

12 **ALERT level C** = Check. Ensure it is not caused by an omission or oversight

25 **ALERT level G** = General information/check it is not something unexpected

4 ALERT type 1 CIF construction/syntax error, inconsistent or missing data

9 ALERT type 2 Indicator that the structure model may be wrong or deficient

12 ALERT type 3 Indicator that the structure quality may be low

11 ALERT type 4 Improvement, methodology, query or suggestion

1 ALERT type 5 Informative message, check

|  |
| --- |

**PLATON version of 02/02/2025; check.def file version of 02/02/2025**

| **Datablock PBr2_ButBr2** - ellipsoid plot |
| --- |
| 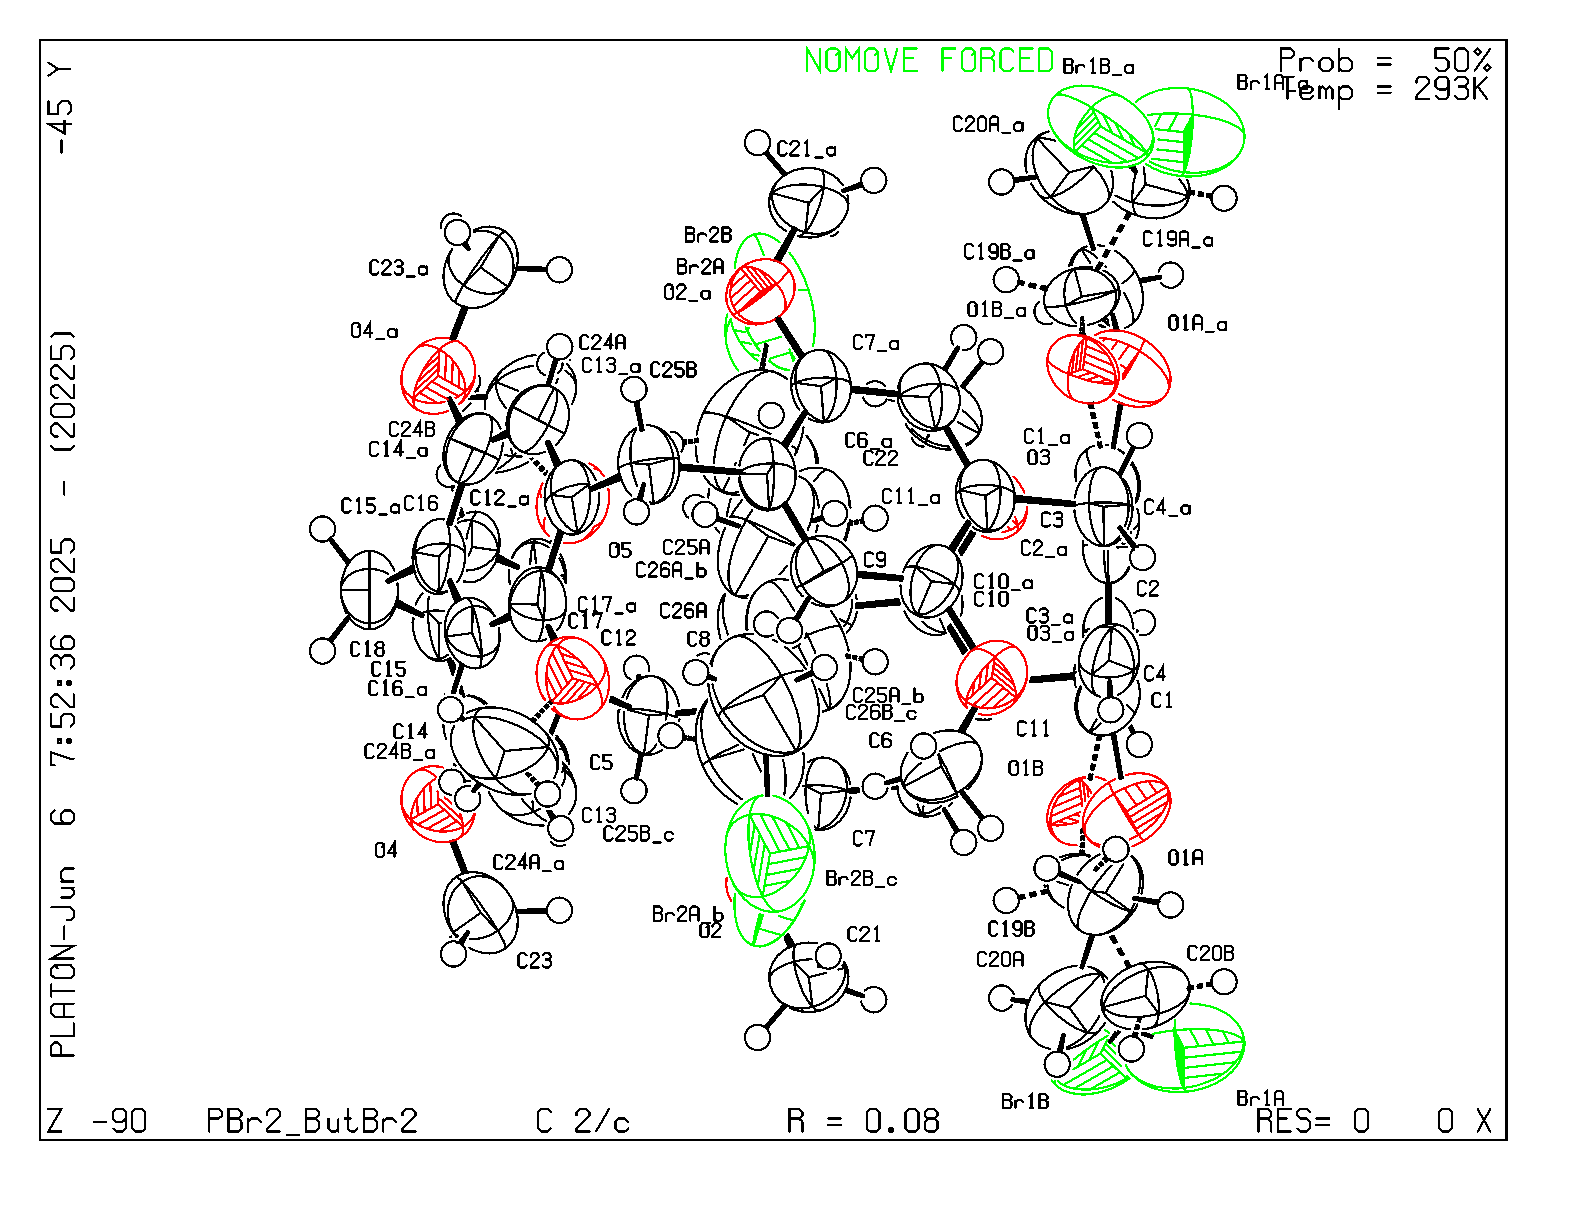 |

**CheckCIF_ PBr4.ButBr2**

# checkCIF (basic structural check) running

*Checking for embedded fcf data in CIF ...*
*Found embedded fcf data in CIF. Extracting fcf data from uploaded CIF, please wait***. . . .**checkCIF/PLATON (basic structural check)Structure factors have been supplied for datablock(s) PBr4_ButBr2

THIS REPORT IS FOR GUIDANCE ONLY. IF USED AS PART OF A REVIEW PROCEDURE FOR PUBLICATION, IT SHOULD NOT REPLACE THE EXPERTISE OF AN EXPERIENCED CRYSTALLOGRAPHIC REFEREE.

No syntax errors found. [CIF dictionary](https://www.iucr.org/iucr-top/cif/cif_core/definitions/index.html)
Please wait while processing .... [Interpreting this report](https://journals.iucr.org/services/cif/checking/checkcifreport.html)

[Structure factor report](https://checkcif.iucr.org/tnejy91zUGw4Z/060625075411640152675/ckf.html)

**Datablock: PBr4_ButBr2**

| Bond precision: | C-C = 0.0101 A | Wavelength=1.54178 |
| --- | --- | --- |

| Cell: | a=12.491(2) | b=12.859(3) | c=19.944(4) |
| --- | --- | --- | --- |
|  | alpha=94.148(10) | beta=93.140(9) | gamma=111.521(8) |
| Temperature: | 296 K |  |  |

|  | Calculated | Reported |
| --- | --- | --- |
| Volume | 2960.9(10) | 2961.0(10) |
| Space group | P -1 | P -1 |
| Hall group | -P 1 | -P 1 |
| Moiety formula | C49 H54 Br4 O10, 0.5(C6 H12 Br2), C4 H8 Br2 | ? |
| Sum formula | C56 H68 Br7 O10 | C56 H68 Br7 O10 |
| Mr | 1460.41 | 1460.47 |
| Dx,g cm-3 | 1.638 | 1.638 |
| Z | 2 | 2 |
| Mu (mm-1) | 6.128 | 6.128 |
| F000 | 1458.0 | 1458.0 |
| F000' | 1451.47 |  |
| h,k,lmax | 14,15,23 | 14,15,23 |
| Nref | 10645 | 10517 |
| Tmin,Tmax | 0.318,0.353 | 0.310,0.620 |
| Tmin' | 0.240 |  |

| Correction method= # Reported T Limits: Tmin=0.310 Tmax=0.620 AbsCorr = MULTI-SCAN |  |
| --- | --- |

| Data completeness= 0.988 | Theta(max)= 67.387 |
| --- | --- |

| R(reflections)= 0.0914( 7640) | wR2(reflections)= 0.2927( 10517) |
| --- | --- |
| | S = 1.043 | Npar= 706 | | --- | --- | |  |

The following ALERTS were generated. Each ALERT has the format

**test-name_ALERT_alert-type_alert-level**.

Click on the hyperlinks for more details of the test.


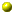
**Alert level C**

[PLAT084_ALERT_3_C](javascript:makeHelpWindow(%22PLAT084.html%22)) High wR2 Value (i.e. > 0.25) ................... 0.29 Report

[PLAT220_ALERT_2_C](javascript:makeHelpWindow(%22PLAT220.html%22)) NonSolvent Resd 1 C Ueq(max)/Ueq(min) Range 3.8 Ratio

[PLAT222_ALERT_3_C](javascript:makeHelpWindow(%22PLAT222.html%22)) NonSolvent Resd 1 H Uiso(max)/Uiso(min) Range 4.6 Ratio

[PLAT234_ALERT_4_C](javascript:makeHelpWindow(%22PLAT234.html%22)) Large Hirshfeld Difference Br4B --C43 . 0.20 Ang.

[PLAT242_ALERT_2_C](javascript:makeHelpWindow(%22PLAT242.html%22)) Low 'MainMol' Ueq as Compared to Neighbors of O6 Check

**And 2 other PLAT242 Alerts**

More ...

[PLAT243_ALERT_4_C](javascript:makeHelpWindow(%22PLAT243.html%22)) High 'Solvent' Ueq as Compared to Neighbors of C50 Check

[PLAT243_ALERT_4_C](javascript:makeHelpWindow(%22PLAT243.html%22)) High 'Solvent' Ueq as Compared to Neighbors of C53 Check

[PLAT244_ALERT_4_C](javascript:makeHelpWindow(%22PLAT244.html%22)) Low 'Solvent' Ueq as Compared to Neighbors of C51 Check

[PLAT244_ALERT_4_C](javascript:makeHelpWindow(%22PLAT244.html%22)) Low 'Solvent' Ueq as Compared to Neighbors of C52 Check

[PLAT260_ALERT_2_C](javascript:makeHelpWindow(%22PLAT260.html%22)) Large Average Ueq of Residue Including Br7A 0.233 Check

[PLAT260_ALERT_2_C](javascript:makeHelpWindow(%22PLAT260.html%22)) Large Average Ueq of Residue Including Br5 0.207 Check

[PLAT341_ALERT_3_C](javascript:makeHelpWindow(%22PLAT341.html%22)) Low Bond Precision on C-C Bonds ............... 0.01015 Ang.

[PLAT906_ALERT_3_C](javascript:makeHelpWindow(%22PLAT906.html%22)) Large K Value in the Analysis of Variance ...... 2.909 Check

[PLAT911_ALERT_3_C](javascript:makeHelpWindow(%22PLAT911.html%22)) Missing FCF Refl Between Thmin & STh/L= 0.599 130 Report

13 2 0, -12 13 0, 12-13 1, -12 13 1, -8 15 1, 12-13 2,

-7-10 2, 14-10 2, -12 -4 2, 14 -1 2, 4 12 2, -7-10 3,

-12 -4 3, 4 -4 3, -14 10 3, -7 15 3, 8-15 4, -9 -8 4,

-13 -2 4, 7 0 4, -12 11 4, -10 14 4, 10-14 5, -8 -9 5,

14 -9 5, 5 -4 5, -11 13 5, 14 -8 6, -14 1 6, 0 3 6,

-14 9 6, -13 11 6, -11 13 6, -9 14 6, 5-15 7, 9-14 7,

11-13 7, 12-12 7, 14 -6 7, 14 -5 7, 4 -3 7, 12 2 7,

9-14 8, 13 -1 8, -14 2 8, -4 14 8, 10-13 9, 11-12 9,

12-11 9, 13 -9 9, -12 -3 9, 13 -2 9, -14 3 9, -11 12 9,

13 -5 10, 13 -4 10, 12 0 10, -13 9 10, 3-14 11, 6-14 11,

9-13 11, 11-11 11, -11 -4 11, -12 -2 11, -13 8 11, -12 10 11,

-4 13 11, 0-13 12, -4-11 12, 12 -2 12, -13 7 12, 3 10 12,

1-13 13, 7-13 13, 9-12 13, 10-11 13, -5-10 13, 12 -6 13,

12 -5 13, 12 -4 13, -11 -3 13, 3-13 14, 5-13 14, 8-12 14,

10 1 14, 7-12 15, 11 -6 15, -9 -5 15, 11 -5 15, 11 -4 15,

10 0 15, -12 2 15, 9 2 15, 2-12 16, 5-12 16, 10 -8 16,

[PLAT975_ALERT_2_C](javascript:makeHelpWindow(%22PLAT975.html%22)) Check Calcd Resid. Dens. 0.65Ang From C56 . 0.69 eA-3

[PLAT977_ALERT_2_C](javascript:makeHelpWindow(%22PLAT977.html%22)) Check Negative Difference Density on H50B . -0.34 eA-3

**And 4 other PLAT977 Alerts**

More ...


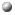
**Alert level G**

[PLAT002_ALERT_2_G](javascript:makeHelpWindow(%22PLAT002.html%22)) Number of Distance or Angle Restraints on AtSite 21 Note

[PLAT003_ALERT_2_G](javascript:makeHelpWindow(%22PLAT003.html%22)) Number of Uiso or U(i,j) Restrained non-H-Atoms 21 Report

[PLAT083_ALERT_2_G](javascript:makeHelpWindow(%22PLAT083.html%22)) SHELXL Second Parameter in WGHT Unusually Large 9.38 Why ?

[PLAT172_ALERT_4_G](javascript:makeHelpWindow(%22PLAT172.html%22)) The CIF-Embedded .res File Contains DFIX Records 6 Report

[PLAT173_ALERT_4_G](javascript:makeHelpWindow(%22PLAT173.html%22)) The CIF-Embedded .res File Contains DANG Records 4 Report

[PLAT175_ALERT_4_G](javascript:makeHelpWindow(%22PLAT175.html%22)) The CIF-Embedded .res File Contains SAME Records 2 Report

[PLAT177_ALERT_4_G](javascript:makeHelpWindow(%22PLAT177.html%22)) The CIF-Embedded .res File Contains DELU Records 4 Report

[PLAT178_ALERT_4_G](javascript:makeHelpWindow(%22PLAT178.html%22)) The CIF-Embedded .res File Contains SIMU Records 4 Report

[PLAT301_ALERT_3_G](javascript:makeHelpWindow(%22PLAT301.html%22)) Main Residue Disorder ..............(Resd 1) 3% Note

[PLAT302_ALERT_4_G](javascript:makeHelpWindow(%22PLAT302.html%22)) Anion/Solvent/Minor-Residue Disorder (Resd 2) 75% Note

[PLAT411_ALERT_2_G](javascript:makeHelpWindow(%22PLAT411.html%22)) Short Inter H...H Contact H28B ..H54D . 1.76 Ang.

-x,1-y,1-z = 2_566 Check

[PLAT413_ALERT_2_G](javascript:makeHelpWindow(%22PLAT413.html%22)) Short Inter XH3 .. XHn H49A ..H54C . 2.06 Ang.

-x,1-y,1-z = 2_566 Check

[PLAT432_ALERT_2_G](javascript:makeHelpWindow(%22PLAT432.html%22)) Short Inter X...Y Contact O10 ..C54B . 2.58 Ang.

-x,1-y,1-z = 2_566 Check

[PLAT432_ALERT_2_G](javascript:makeHelpWindow(%22PLAT432.html%22)) Short Inter X...Y Contact C49 ..C54B . 3.04 Ang.

-x,1-y,1-z = 2_566 Check

[PLAT434_ALERT_2_G](javascript:makeHelpWindow(%22PLAT434.html%22)) Short Inter HL..HL Contact Br6 ..Br7B . 3.41 Ang.

x,y,z = 1_555 Check

[PLAT860_ALERT_3_G](javascript:makeHelpWindow(%22PLAT860.html%22)) Number of Least-Squares Restraints ............. 197 Note

[PLAT883_ALERT_1_G](javascript:makeHelpWindow(%22PLAT883.html%22)) Absent Datum for _atom_sites_solution_primary .. Please Do !

[PLAT909_ALERT_3_G](javascript:makeHelpWindow(%22PLAT909.html%22)) Percentage of I>2sig(I) Data at Theta(Max) Still 40% Note

[PLAT941_ALERT_3_G](javascript:makeHelpWindow(%22PLAT941.html%22)) Average HKL Measurement Multiplicity ........... 4.1 Low

[PLAT965_ALERT_2_G](javascript:makeHelpWindow(%22PLAT965.html%22)) The SHELXL WEIGHT Optimisation has not Converged Please Check

[PLAT969_ALERT_5_G](javascript:makeHelpWindow(%22PLAT969.html%22)) The 'Henn et al.' R-Factor-gap value ........... 4.922 Note

Predicted wR2: Based on SigI**2 5.95 or SHELX Weight 28.05

[PLAT978_ALERT_2_G](javascript:makeHelpWindow(%22PLAT978.html%22)) Number C-C Bonds with Positive Residual Density. 2 Info

[PLAT992_ALERT_5_G](javascript:makeHelpWindow(%22PLAT992.html%22)) Repd & Actual _reflns_number_gt Values Differ by 2 Check

0 **ALERT level A** = Most likely a serious problem - resolve or explain

0 **ALERT level B** = A potentially serious problem, consider carefully

22 **ALERT level C** = Check. Ensure it is not caused by an omission or oversight

23 **ALERT level G** = General information/check it is not something unexpected

1 ALERT type 1 CIF construction/syntax error, inconsistent or missing data

22 ALERT type 2 Indicator that the structure model may be wrong or deficient

9 ALERT type 3 Indicator that the structure quality may be low

11 ALERT type 4 Improvement, methodology, query or suggestion

2 ALERT type 5 Informative message, check

**PLATON version of 02/02/2025; check.def file version of 02/02/2025**

| **Datablock PBr4_ButBr2** - ellipsoid plot |
| --- |
| 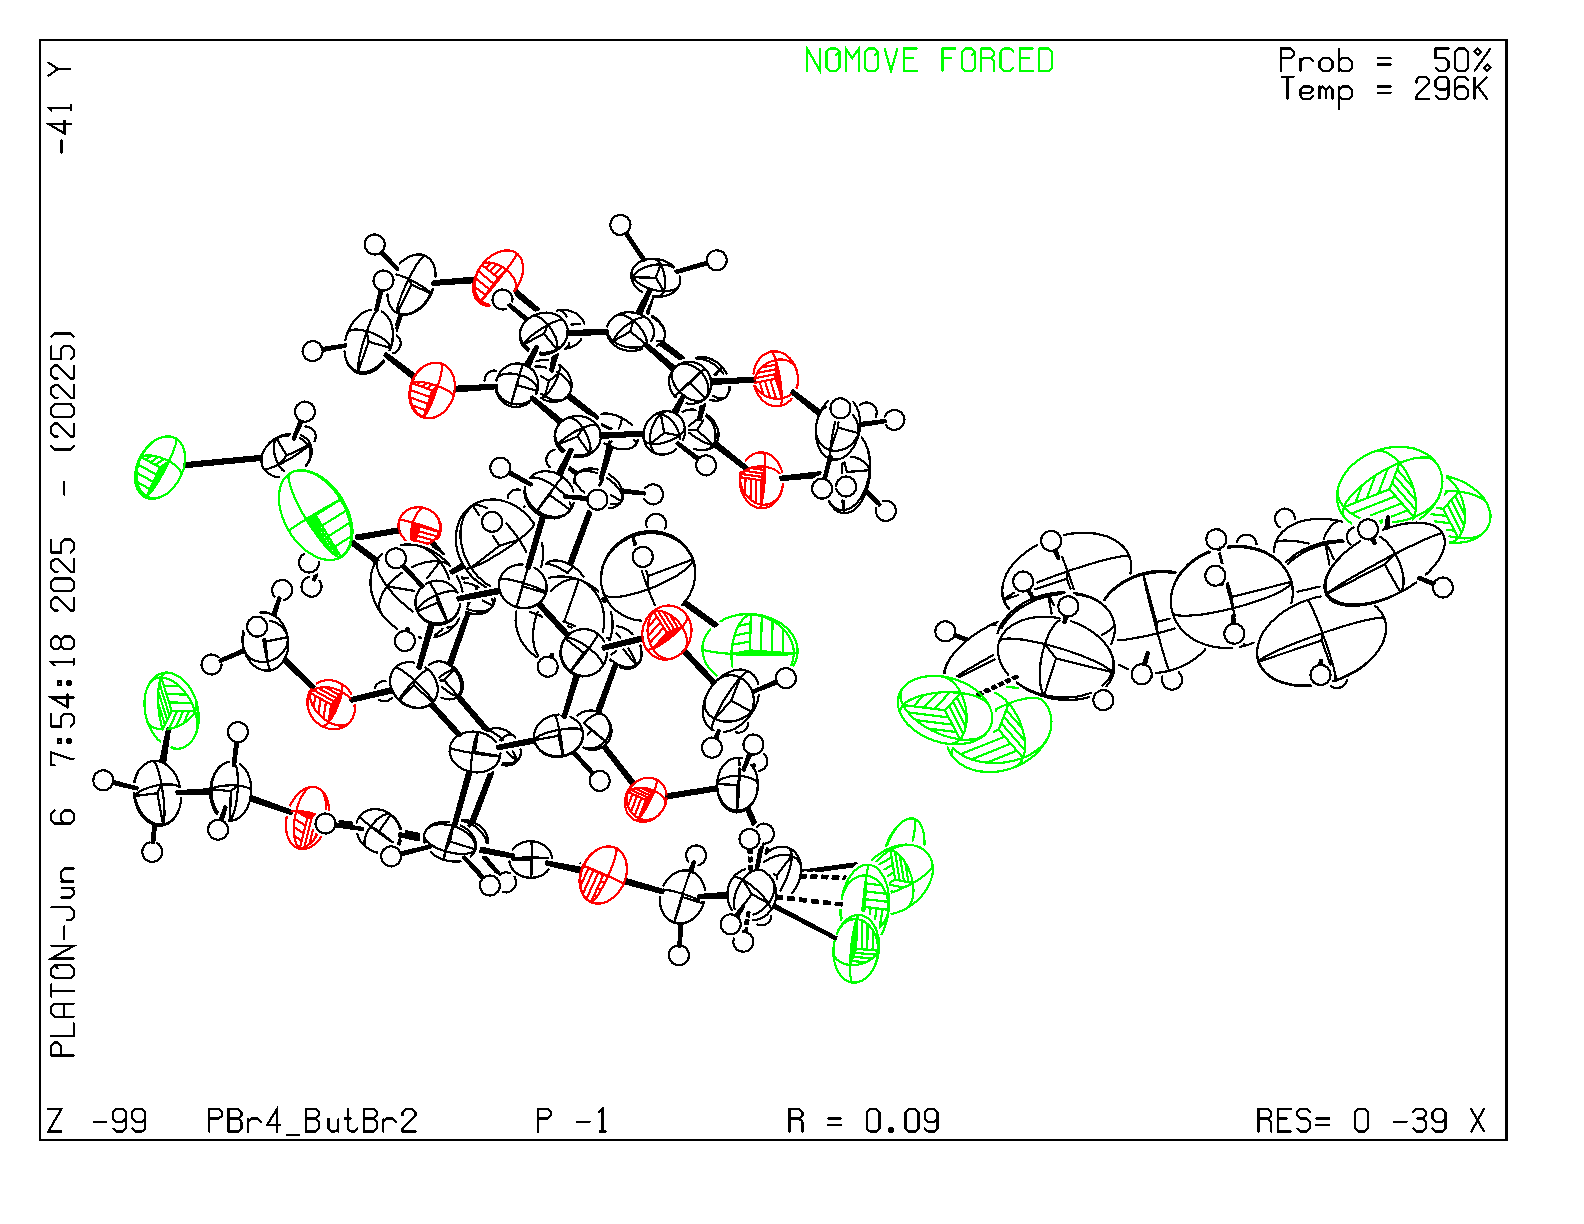 |

**CheckCIF_ PBr6.ButBr2**

# checkCIF (basic structural check) running

*Checking for embedded fcf data in CIF ...*
*Found embedded fcf data in CIF. Extracting fcf data from uploaded CIF, please wait***. . . . . .**

# checkCIF/PLATON (basic structural check)

Structure factors have been supplied for datablock(s) PBr6_ButBr2

THIS REPORT IS FOR GUIDANCE ONLY. IF USED AS PART OF A REVIEW PROCEDURE FOR PUBLICATION, IT SHOULD NOT REPLACE THE EXPERTISE OF AN EXPERIENCED CRYSTALLOGRAPHIC REFEREE.

No syntax errors found. [CIF dictionary](https://www.iucr.org/iucr-top/cif/cif_core/definitions/index.html)
Please wait while processing .... [Interpreting this report](https://journals.iucr.org/services/cif/checking/checkcifreport.html)

[Structure factor report](https://checkcif.iucr.org/dLfIi3LPOb8Xx/060625075642413537824/ckf.html)

**Datablock: PBr6_ButBr2**

| Bond precision: | C-C = 0.0148 A | Wavelength=1.54178 |
| --- | --- | --- |

| Cell: | a=41.472(5) | b=17.4570(17) | c=16.6459(17) |
| --- | --- | --- | --- |
|  | alpha=90 | beta=90 | gamma=90 |
| Temperature: | 296 K |  |  |

|  | Calculated | Reported |
| --- | --- | --- |
| Volume | 12051(2) | 12051(2) |
| Space group | A b a 2 | A b a 2 |
| Hall group | A 2 -2ac | A 2 -2ac |
| Moiety formula | C51 H56 Br6 O10, C4 H8 Br2 | ? |
| Sum formula | C55 H64 Br8 O10 | C55 H64 Br8 O10 |
| Mr | 1524.27 | 1524.34 |
| Dx,g cm-3 | 1.680 | 1.680 |
| Z | 8 | 8 |
| Mu (mm-1) | 6.800 | 6.799 |
| F000 | 6032.0 | 6032.0 |
| F000' | 6000.41 |  |
| h,k,lmax | 49,20,19 | 49,20,19 |
| Nref | 10714[ 5562] | 9315 |
| Tmin,Tmax | 0.287,0.473 | 0.330,0.640 |
| Tmin' | 0.209 |  |

| Correction method= # Reported T Limits: Tmin=0.330 Tmax=0.640 AbsCorr = MULTI-SCAN |  |
| --- | --- |

| Data completeness= 1.67/0.87 | Theta(max)= 66.794 |
| --- | --- |

| R(reflections)= 0.0750( 8406) | wR2(reflections)= 0.2245( 9315) |
| --- | --- |
| | S = 1.038 | Npar= 659 | | --- | --- | |  |

The following ALERTS were generated. Each ALERT has the format

**test-name_ALERT_alert-type_alert-level**.

Click on the hyperlinks for more details of the test.


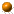
**Alert level B**

[PLAT910_ALERT_3_B](javascript:makeHelpWindow(%22PLAT910.html%22)) Missing # of FCF Reflection(s) Below Theta(Min). 45 Note

0 2 0, 0 4 0, 1 2 0, 1 4 0, 2 0 0, 2 2 0,

3 2 0, 4 0 0, 4 2 0, 5 2 0, 6 0 0, 6 2 0,

7 2 0, 8 0 0, 8 2 0, 1 1 1, 1 3 1, 2 1 1,

2 3 1, 3 1 1, 3 3 1, 4 1 1, 4 3 1, 5 1 1,

**RESPONSE:** The unit cell is reasonable large and these low angle reflections are probably missing due to the beamstop. This occurs rather frequently with our goniometer's geometry, especially for larger unit cells.


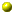
**Alert level C**

[PLAT094_ALERT_2_C](javascript:makeHelpWindow(%22PLAT094.html%22)) Ratio of Maximum / Minimum Residual Density .... 2.06 Report

[PLAT234_ALERT_4_C](javascript:makeHelpWindow(%22PLAT234.html%22)) Large Hirshfeld Difference C44 --C45 . 0.18 Ang.

[PLAT242_ALERT_2_C](javascript:makeHelpWindow(%22PLAT242.html%22)) Low 'MainMol' Ueq as Compared to Neighbors of C37 Check

**And 3 other PLAT242 Alerts**

More ...

[PLAT243_ALERT_4_C](javascript:makeHelpWindow(%22PLAT243.html%22)) High 'Solvent' Ueq as Compared to Neighbors of C55 Check

[PLAT260_ALERT_2_C](javascript:makeHelpWindow(%22PLAT260.html%22)) Large Average Ueq of Residue Including Br7 0.186 Check

[PLAT341_ALERT_3_C](javascript:makeHelpWindow(%22PLAT341.html%22)) Low Bond Precision on C-C Bonds ............... 0.01476 Ang.

[PLAT601_ALERT_2_C](javascript:makeHelpWindow(%22PLAT601.html%22)) Unit Cell Contains Solvent Accessible VOIDS <= 54 Ang**3

[PLAT911_ALERT_3_C](javascript:makeHelpWindow(%22PLAT911.html%22)) Missing FCF Refl Between Thmin & STh/L= 0.596 63 Report

0 6 0, 0 8 0, 0 10 0, 1 6 0, 1 8 0, 2 4 0,

2 6 0, 17 12 0, 22 18 0, 23 18 0, 24 18 0, 25 8 0,

26 8 0, 27 8 0, 39 12 0, 40 10 0, 40 12 0, 41 10 0,

42 10 0, 43 10 0, 1 5 1, 1 7 1, 2 5 1, 20 19 1,

41 11 1, 0 4 2, 0 6 2, 0 8 2, 1 4 2, 1 6 2,

23 18 2, 24 18 2, 6 1 3, 0 0 4, 0 2 4, 1 2 4,

2 0 4, 2 2 4, 4 0 4, 30 16 4, 1 1 5, 2 1 5,

3 1 5, 0 0 6, 2 0 6, 10 19 7, 10 16 12, 21 14 12,

11 15 13, 21 13 13, 11 14 14, 22 0 14, 32 6 14, 19 11 15,

0 0 16, 6 12 16, 17 10 16, 22 8 16, 0 0 18, 8 8 18,

15 6 18, 12 3 19, 14 1 19,


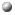
**Alert level G**

[PLAT002_ALERT_2_G](javascript:makeHelpWindow(%22PLAT002.html%22)) Number of Distance or Angle Restraints on AtSite 6 Note

[PLAT003_ALERT_2_G](javascript:makeHelpWindow(%22PLAT003.html%22)) Number of Uiso or U(i,j) Restrained non-H-Atoms 6 Report

[PLAT083_ALERT_2_G](javascript:makeHelpWindow(%22PLAT083.html%22)) SHELXL Second Parameter in WGHT Unusually Large 13.76 Why ?

[PLAT172_ALERT_4_G](javascript:makeHelpWindow(%22PLAT172.html%22)) The CIF-Embedded .res File Contains DFIX Records 2 Report

[PLAT173_ALERT_4_G](javascript:makeHelpWindow(%22PLAT173.html%22)) The CIF-Embedded .res File Contains DANG Records 2 Report

[PLAT177_ALERT_4_G](javascript:makeHelpWindow(%22PLAT177.html%22)) The CIF-Embedded .res File Contains DELU Records 1 Report

[PLAT178_ALERT_4_G](javascript:makeHelpWindow(%22PLAT178.html%22)) The CIF-Embedded .res File Contains SIMU Records 1 Report

[PLAT188_ALERT_3_G](javascript:makeHelpWindow(%22PLAT188.html%22)) A Non-default SIMU Restraint Value has been used 0.0100 Report

[PLAT434_ALERT_2_G](javascript:makeHelpWindow(%22PLAT434.html%22)) Short Inter HL..HL Contact Br2 ..Br3 . 3.43 Ang.

x,-1/2+y,-1/2+z = 5_544 Check

[PLAT860_ALERT_3_G](javascript:makeHelpWindow(%22PLAT860.html%22)) Number of Least-Squares Restraints ............. 49 Note

[PLAT883_ALERT_1_G](javascript:makeHelpWindow(%22PLAT883.html%22)) Absent Datum for _atom_sites_solution_primary .. Please Do !

[PLAT909_ALERT_3_G](javascript:makeHelpWindow(%22PLAT909.html%22)) Percentage of I>2sig(I) Data at Theta(Max) Still 73% Note

[PLAT915_ALERT_3_G](javascript:makeHelpWindow(%22PLAT915.html%22)) No Flack x Check Done: Low Friedel Pair Coverage 75 %

[PLAT941_ALERT_3_G](javascript:makeHelpWindow(%22PLAT941.html%22)) Average HKL Measurement Multiplicity ........... 3.1 Low

[PLAT965_ALERT_2_G](javascript:makeHelpWindow(%22PLAT965.html%22)) The SHELXL WEIGHT Optimisation has not Converged Please Check

[PLAT969_ALERT_5_G](javascript:makeHelpWindow(%22PLAT969.html%22)) The 'Henn et al.' R-Factor-gap value ........... 2.716 Note

Predicted wR2: Based on SigI**2 8.27 or SHELX Weight 21.63

[PLAT978_ALERT_2_G](javascript:makeHelpWindow(%22PLAT978.html%22)) Number C-C Bonds with Positive Residual Density. 0 Info

[PLAT992_ALERT_5_G](javascript:makeHelpWindow(%22PLAT992.html%22)) Repd & Actual _reflns_number_gt Values Differ by 5 Check

0 **ALERT level A** = Most likely a serious problem - resolve or explain

1 **ALERT level B** = A potentially serious problem, consider carefully

11 **ALERT level C** = Check. Ensure it is not caused by an omission or oversight

18 **ALERT level G** = General information/check it is not something unexpected

1 ALERT type 1 CIF construction/syntax error, inconsistent or missing data

13 ALERT type 2 Indicator that the structure model may be wrong or deficient

8 ALERT type 3 Indicator that the structure quality may be low

6 ALERT type 4 Improvement, methodology, query or suggestion

2 ALERT type 5 Informative message, check

**PLATON version of 02/02/2025; check.def file version of 02/02/2025**

| **Datablock PBr6_ButBr2** - ellipsoid plot |
| --- |
| 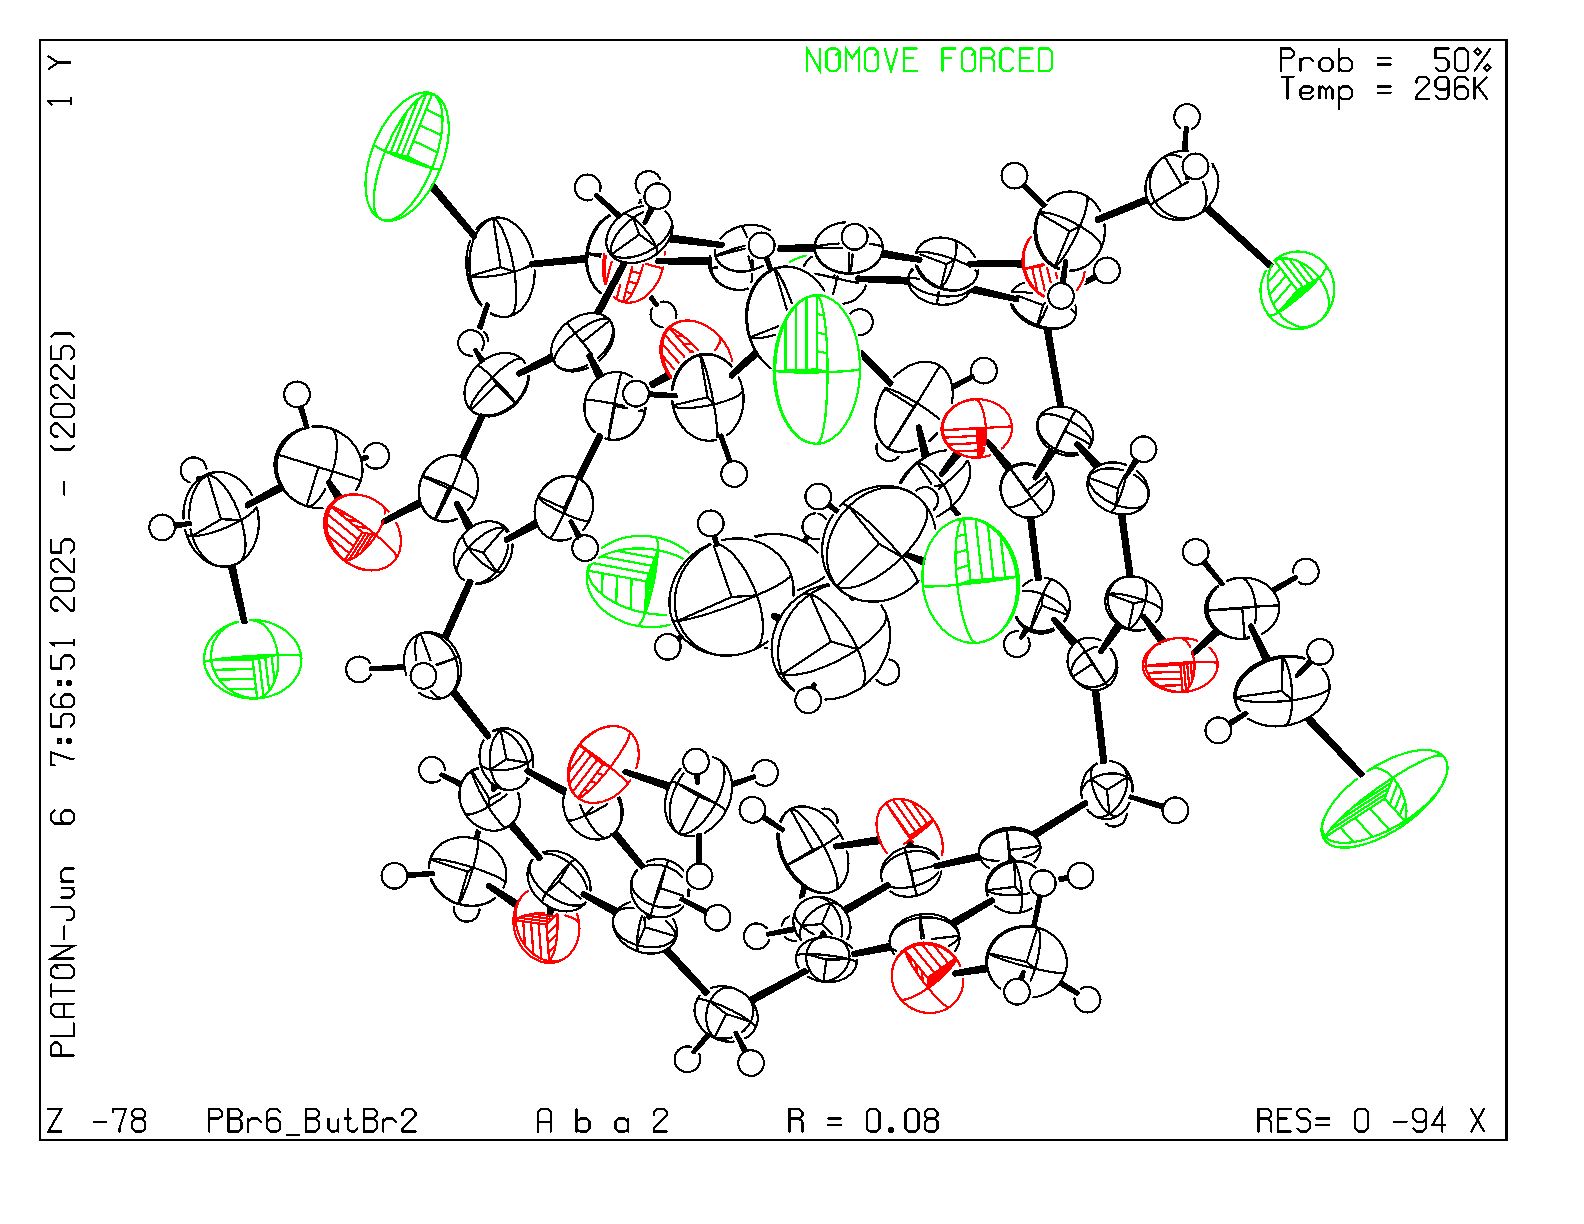 |
